1 **Title Page**

2 **The maize *Hairy Sheath Frayed1 (Hsf1)* mutant alters leaf patterning through**  
3 **increased cytokinin signaling**

4

5 **Author names and affiliations**

6 Michael G. Muszynski, <sup>a,1</sup> Lindsay Moss-Taylor, <sup>b,2</sup> Sivanandan Chudalayandi, <sup>b,3</sup>  
7 James Cahill, <sup>b,4</sup> Angel R. Del Valle-Echevarria, <sup>a</sup> Ignacio Alvarez-Castro, <sup>c,5</sup> Abby  
8 Petefish, <sup>b</sup> Hitoshi Sakakibara, <sup>d</sup> Dmitry M. Krivosheev, <sup>e,6</sup> Sergey N. Lomin, <sup>e</sup> Georgy  
9 A. Romanov, <sup>e</sup> Subbiah Thamocharan, <sup>f</sup> Bailin Li, <sup>g</sup> and Norbert Brugière <sup>g</sup>

10 <sup>a</sup> Department of Tropical Plant and Soil Sciences, University of Hawai'i at Mānoa,  
11 Honolulu, HI 96822, USA.

12 <sup>b</sup> Department of Genetics, Development and Cell Biology, Iowa State University, Ames,  
13 Iowa, 50011

14 <sup>c</sup> Department of Statistics, Iowa State University, Ames IA, 50011

15 <sup>d</sup> RIKEN Center for Sustainable Resource Science, Tsurumi, Yokohama 230-0045,  
16 Japan.

17 <sup>e</sup> Timiryazev Institute of Plant Physiology, Russian Academy of Sciences, Moscow,  
18 127276, Russia

19 <sup>f</sup> School of Chemical and Biotechnology, SASTRA University; Thanjavur, 613401, India

20 <sup>g</sup> Corteva Agriscience, Johnston, IA 50131

21

22 ORCID IDs: 0000-0002-0817-7594 (M.G.M.);

23

24 <sup>1</sup> Address correspondence to [mgmuszyn@hawaii.edu](mailto:mgmuszyn@hawaii.edu).

25 <sup>2</sup> Present address: Department of Laboratory Medicine and Pathology, University of  
26 Minnesota, Minneapolis, MN 55455, USA

27 <sup>3</sup> Genome Informatics Facility, Iowa State University, Ames, Iowa, 50011

28 <sup>4</sup> Present address: Corteva Agriscience, Johnston, IA 50131

29 <sup>5</sup> Present address: Instituto de Estadística, Universidad de la República, Montevideo,  
30 Uruguay

31 <sup>6</sup> Present address: Vologda State University, Vologda 160000, Russia

32

33 Short Title: Cytokinin influences leaf development

34

35 The author responsible for distribution of materials integral to the findings presented in  
36 this article in accordance with the policy described in the Instructions for Authors  
37 ([www.plantcell.org](http://www.plantcell.org)) is: Michael G. Muszynski ([mgmuszyn@hawaii.edu](mailto:mgmuszyn@hawaii.edu)).

38

39 Summary: Increased cytokinin signaling in the maize *Hairy Sheath Frayed1* mutant  
40 modifies leaf development leading to changes in patterning, growth and cell identity.

41

42

## 43 **ABSTRACT**

44 **Leaf morphogenesis requires growth polarized along three axes - proximal-distal,**  
45 **medial-lateral and abaxial-adaxial. Grass leaves display a prominent proximal-**  
46 **distal (P-D) polarity consisting of a proximal sheath separated from the distal**  
47 **blade by the auricle and ligule. Although proper specification of the four**  
48 **segments is essential for normal morphology, our knowledge is incomplete**  
49 **regarding the mechanisms which influence P-D specification in monocots like**  
50 **maize (*Zea mays*). Here we report the identification of the gene underlying the**  
51 **semi-dominant, leaf patterning, maize mutant *Hairy Sheath Frayed1 (Hsf1)*. *Hsf1***  
52 **plants produce leaves with outgrowths consisting of proximal segments –**  
53 **sheath, auricle and ligule – emanating from the distal blade margin. Analysis of**  
54 **three independent *Hsf1* alleles revealed gain-of-function missense mutations in**  
55 **the ligand binding domain of the maize cytokinin (CK) receptor *Zea mays***  
56 ***Histidine Kinase1 (ZmHK1)* gene. Biochemical analysis and structural modeling**  
57 **suggest the mutated residues near the CK binding pocket affect CK binding**  
58 **affinity. Treatment of wild type seedlings with exogenous CK phenocopied the**  
59 ***Hsf1* leaf phenotypes. Results from expression and epistatic analyses indicated**  
60 **the *Hsf1* mutant receptor appears to be hypersignaling. Our results demonstrate**  
61 **that hypersignaling of CK in incipient leaf primordia can reprogram**  
62 **developmental patterns in maize.**

63

## 64 **INTRODUCTION**

65 Proper leaf morphogenesis in higher plants requires defined patterns of growth  
66 polarized along three axes: adaxial-abaxial, medial-lateral and proximal-distal  
67 (McConnell and Barton, 1998; Tsukaya, 1998; Bowman et al., 2002; Byrne et al., 2002).  
68 Growth along the proximal-distal (P-D) axis is particularly evident in grass leaves, like  
69 maize, which are composed of four distinct segments; the sheath is proximal, the blade

70 is distal and the auricle and ligule form the boundary between the two (Figure 1A)  
71 (Sylvester et al., 1996). A number of genes have been identified that influence P-D  
72 patterning, with *BLADE-ON-PETIOLE (BOP)* genes affecting proximal identity in  
73 eudicots and monocots (Ha et al., 2003, 2004; Norberg et al., 2005; Toriba et al., 2019;  
74 Moon et al., 2013; Tavakol et al., 2015). In grasses, ectopic expression of class I  
75 *knotted1like homeobox (knox)* transcription factor genes in developing leaf primordia  
76 alters P-D patterning, primarily disrupting the formation of a defined sheath-blade  
77 boundary (Freeling and Hake, 1985; Hake et al., 1989, 1991; Smith et al., 1992;  
78 Schneeberger et al., 1995; Muehlbauer et al., 1997; Foster et al., 1999a; Tsiantis et al.,  
79 1999; Byrne et al., 2001). Class I *knox* genes typically function in meristem formation  
80 and maintenance, and their down-regulation is required for normal development of  
81 determinant organs like leaves (Endrizzi et al., 1996; Long et al., 1996; Kerstetter et al.,  
82 1994). In meristems, KNOX proteins function to increase cytokinin (CK) accumulation  
83 by positive regulation of CK synthesis genes and simultaneously decrease gibberellic  
84 acid (GA) accumulation by suppression of GA biosynthesis genes or activation of GA  
85 catabolic genes (Ori et al., 2000; Sakamoto et al., 2001; Hay et al., 2002; Jasinski et al.,  
86 2005; Yanai et al., 2005; Sakamoto et al., 2006; Bolduc and Hake, 2009). In addition, a  
87 rice KNOX transcription factor was shown to also affect brassinosteroid (BR)  
88 accumulation by upregulating BR catabolism in the shoot apical meristem (Tsuda et al.,  
89 2014). Determinate leaf primordia form when *knox* expression is down-regulated by the  
90 action of ROUGH SHEATH2 (RS2) and related proteins resulting in a decrease in CK  
91 and increase in GA accumulation (Hay et al., 2006; Guo et al., 2008). In addition to the  
92 action of CK and GA, auxin is required for proper leaf initiation and positioning. The  
93 polar transport of auxin by PINFORMED1 (PIN1) auxin efflux carriers guides the  
94 formation of auxin maxima, localized regions of high auxin accumulation, that is  
95 required for initiation of leaf primordia (Pozzi et al., 2001; Scarpella et al., 2006;  
96 Benjamins and Scheres, 2008; Zhao, 2008). The emerging model predicts that spatial  
97 differences in cytokinin/auxin ratios control final cell fate (Shani et al., 2006; Muller and  
98 Sheen, 2008). Ectopic *knox* expression presumably shifts critical phytohormone ratios  
99 in developing leaf primordia but the exact molecular mechanisms by which  
100 phytohormone ratios determine leaf patterning remain incomplete.

101 As phytohormones play pivotal roles in many developmental programs, the  
102 pathways that signal their perception and response have been well characterized. For  
103 example, the perception and response to the CK phytohormones relies on a two-  
104 component signal transduction system (Hwang and Sheen, 2001; Yonekura-Sakakibara  
105 et al., 2004; Hwang and Sakakibara, 2006; Du et al., 2007; To and Kieber, 2008). The  
106 perception of CK is mediated via a partially redundant signaling system of histidine  
107 kinases (HKs), histidine phosphotransfer proteins (HPTs) and response regulators  
108 (RRs). CK signaling begins with the perception of CK by binding to HK receptors at the  
109 ER, and probably also plasma membrane, which triggers receptor phosphorylation  
110 (Lomin et al., 2011). The activated receptors initiate phosphorelay by transferring  
111 phosphoryl groups to HPTs, which shuttle between the cytoplasm and nucleus. Once in  
112 the nucleus, phosphorylated HPTs transfer their phosphoryl groups to type-B RRs,  
113 which in turn activate expression of type-A RRs and other CK responsive genes  
114 (Rashotte et al., 2006). The type-A RRs and other CK-responsive genes mediate  
115 several CK-regulated processes including shoot and root growth, de-etiolation, leaf  
116 expansion, root vascular development, senescence, and cytokinin homeostasis (To and  
117 Kieber, 2008). In maize, multiple members of each of the CK signaling components  
118 have been identified (Yonekura-Sakakibara et al., 2004). Maize has seven HKs  
119 (ZmHKs), of which, three have been shown to bind and signal various types of CKs in  
120 heterologous assays (Lomin et al., 2011; Steklov et al., 2013). Three HPTs (ZmHPs),  
121 three type-B RRs and seven type-A RRs (ZmRRs) have also been identified in maize  
122 (Asakura et al., 2003). Of these signal transduction components, the function of only  
123 *ZmRR3*, a type-A RR, has been defined by null mutations and shown to underlie the  
124 *aberrant phyllotaxy1 (abph1)* mutation (Jackson and Hake, 1999; Giulini et al., 2004).  
125 Our understanding of the functions of other components of the CK signal transduction  
126 pathway remains incomplete for cereal species like maize.

127 To gain a better understanding of the signaling mechanisms which mediate leaf  
128 pattern specification, we initiated a study of the semi-dominant *Hairy Sheath Frayed1*  
129 (*Hsf1*) mutation which alters P-D leaf development in maize (Bertrand-Garcia and  
130 Freeling, 1991a). Although *Hsf1* disrupts the P-D leaf pattern similar to dominant class I

131 *knox* mutations, *Hsf1* is not itself a *knox* gene, since it does not map to the location of  
132 any maize *knox* genes (Bertrand-Garcia and Freeling, 1991b). In this report, we show  
133 that the *Hsf1* phenotype results from specific missense mutations in the maize CK  
134 receptor *Zea mays Histidine Kinase1 (ZmHK1)* gene (Yonekura-Sakakibara et al.,  
135 2004). Our analyses of mutant receptor function, the effects of exogenous CK  
136 treatment on leaf development, and epistatic interaction suggest that the ZmHK1  
137 receptor is hypersignaling in *Hsf1* mutants. Overall, our results indicate CK  
138 hypersignaling can influence the specification of P-D leaf patterning in maize and  
139 underscores the capacity of CK to alter developmental programs.

140

## 141 **RESULTS**

### 142 **The *Hsf1* mutation induces specific alterations to maize leaf patterning**

143 The original *Hsf1* mutation arose via ethyl methanesulfonate (EMS) mutagenesis of the  
144 inbred line Mo17 and was designated *Hsf1-N1595* (also called *Hsf1-O*) (Bird and  
145 Neuffer, 1985). A second mutation, *Hsf1-N1603* (hereafter called *Hsf1-1603*), was  
146 shown to be allelic or very closely linked (Bertrand-Garcia and Freeling, 1991a). We  
147 isolated three additional alleles in independent EMS mutagenesis screens in different  
148 inbred backgrounds: *Hsf1-AEWL* in A619, *Hsf1-2559* in Mo17, and *Hsf1-7322* in A632.  
149 All *Hsf1* alleles have very similar phenotypes compared to the *Hsf1-N1595* (hereafter  
150 called *Hsf1-1595*) reference mutation. As was shown previously for *Hsf1-1595*, plants  
151 heterozygous for any of the *Hsf1* alleles display a highly penetrant mutant leaf  
152 patterning phenotype with outgrowths consisting of sheath, auricle and ligule emanating  
153 from the distal blade margin (Figures 1A to 1C) (Bertrand-Garcia and Freeling, 1991a).  
154 The outgrowths have proximal identity and were termed “prongs”, which we adopted to  
155 describe this structure (Figure 1B). Although *Hsf1* mutant plants have proximal tissue  
156 growing on the distal blade, they have a normal blade-sheath boundary (Figure 1A)  
157 (Bertrand-Garcia and Freeling, 1991a). All the pleiotropic phenotypes described for  
158 *Hsf1-1595* in Bertrand-Garcia and Freeling (1991a) are shared by all the other *Hsf1*

159 alleles, including an increase in macrohair size and density on the abaxial sheath,  
160 adaxial blade, and blade margin, an increase in leaf number, shorter stature, short and  
161 narrow leaves, and reduced root growth (Supplemental Figures 1A to 1B; Supplemental  
162 Table 1). Bertrand-Garcia and Freeling (1991a) also showed homozygous *Hsf1* plants  
163 have a stronger mutant phenotype being extremely stunted, with multiple shoots arising  
164 from the coleoptile node at germination, and having adventitious needle- or club-shaped  
165 leaves (Supplemental Figures 1A to 1B).

166 Since plants heterozygous for either *Hsf1-1595*, *Hsf1-1603*, or *Hsf1-AEWL* were  
167 phenotypically very similar (Figure 1C), we chose the *Hsf1-1603* allele to characterize  
168 the temporal and spatial patterns of prong formation to better understand how the *Hsf1*  
169 mutation affected leaf patterning. In *Hsf1-1603* heterozygotes, prongs first appeared on  
170 leaf 5 in a few plants, and most commonly appeared on leaf 6 or leaf 7 but never on  
171 earlier arising leaves (Supplemental Figure 1C). The earliest sign of P-D leaf polarity  
172 specification is the formation of the preligule band (PLB) which will differentiate into the  
173 auricle and ligule (Sylvester et al., 1990; Johnston et al., 2014). Formation of the PLB  
174 typically is first observed in plastochron 5 or 6 stage leaf primordia (P5 - P6) with the  
175 initiating ligule becoming visible about plastochron 7 or 8 (P7 - P8) (Johnston et al.,  
176 2014). Plastochron describes the stage of leaf primordia development and refers to the  
177 position of the primordia relative to the shoot apical meristem (SAM) (Sylvester et al.,  
178 1990). Thus, a P5 primordium has four younger primordia between it and the SAM. To  
179 determine if the *Hsf1-1603* mutation influenced the timing of the acquisition of P-D  
180 polarity, we examined leaf primordia in *Hsf1-1603/+* and wild type sib plants for signs of  
181 early ligule development (see Methods). The initiating ligule was most commonly first  
182 visible on P7 primordia in both wild type and *Hsf1-1603* heterozygotes indicating no  
183 influence on P-D polarity acquisition (Supplemental Figure 1E). To determine if the  
184 appearance of prong primordia on the blade margin coincided with the acquisition of P-  
185 D polarity, developing leaf primordia from *Hsf1-1603* heterozygotes were dissected and  
186 examined for the presence of initiating prongs. Prong initials were most commonly  
187 observed on the blade margins of P5 or P6 leaf primordia but some were noted as early  
188 as P4 (Supplemental Figure 1D, 1F to 1G), consistent with prong formation in *Hsf1-*

189 1595 heterozygotes (Bertrand-Garcia and Freeling, 1991b). Thus prongs typically  
190 initiated from blade margins about the same plastochron stage as formation of the PLB.

191 Prongs were observed to occur in different sizes and at different positions along  
192 the leaf blade margin (Figures 1B and 1F, and Supplemental Figure 2A). To determine  
193 if prong formation was random or patterned, we measured the size and position of each  
194 prong from both margins of mature leaves collected from different positions on the shoot  
195 of *Hsf1-1595*, *Hsf1-1603* and *Hsf1-AEWL* heterozygous plants. Results showed that  
196 prong formation was more frequent on leaves higher on the shoot (Supplemental Table  
197 2) with prongs occupying more of the blade margin in these upper leaves compared to  
198 lower leaves (Supplemental Figures 2B and 2C). Next we determined where prongs  
199 formed along the P-D axis of the blade. Analysis indicated prongs only formed in the  
200 proximal 70% and never in the distal 30% of the blade, with the majority of prongs  
201 forming within a region encompassing the proximal 15% to 40% of the blade  
202 (Supplemental Figure 2D). Next we examined the range of prong sizes for each *Hsf1*  
203 allele within this prong-forming region. For all three alleles, the majority of prongs were  
204 about a centimeter in size but a few were larger, ranging from 3 to 6 centimeters  
205 (Supplemental Figure 2E). With relative position and size known, we next asked  
206 whether prong position was related to its size. In general, the largest prongs often  
207 formed in the basal 20% of the blade and smaller prongs formed at any position within  
208 the prong forming region (Supplemental Figure 2F). Thus, our analysis indicated prong  
209 formation was not random but occurred in particular regions of the blade and initiated at  
210 specific developmental stages.

211

## 212 **Gain-of-function mutations in the maize cytokinin receptor gene *ZmHK1* underlie** 213 **the *Hsf1* mutation**

214 Previous studies mapped *Hsf1-1595* to the long arm of chromosome 5 (Bertrand-Garcia  
215 and Freeling, 1991b). To isolate the gene underlying the *Hsf1* locus, we screened a  
216 backcross mapping population of over 3,000 plants with linked molecular markers



217 derived from the maize reference genome (B73 RefGen\_v1). The *Hsf1* locus was  
218 localized to a 21-kb interval with a single gene model (GRMZM2G151223, B73  
219 RefGen\_v2). This gene model was well supported with abundant EST evidence and  
220 was annotated as encoding *Zea mays Histidine Kinase1 (ZmHK1)*, one of seven maize  
221 histidine kinase cytokinin receptors (Yonekura-Sakakibara et al., 2004; Steklov et al.,  
222 2013). To confirm *ZmHK1* was the correct gene and to identify the causative lesions,  
223 the *ZmHK1* gene was sequenced from all five *Hsf1* alleles. The entire *ZmHK1* genomic  
224 region, including ca. 2-kb upstream and downstream of the transcription start and stop,  
225 was sequenced from *Hsf1-1595*, *Hsf1-1603*, *Hsf1-2559*, *Hsf1-7322* and *Hsf1-AEWL*  
226 homozygotes and their progenitor inbred lines. As expected for EMS-generated  
227 mutations, single nucleotide transitions were identified in the five *Hsf1* alleles compared  
228 to their progenitor sequences. Although each allele arose independently, *Hsf1-1595*  
229 and *Hsf1-1603* had the exact same transition mutations as *Hsf1-7322* and *Hsf1-2559*,  
230 respectively. Thus, hereafter, we refer to the three different *Hsf1* alleles: *Hsf1-1595*,  
231 *Hsf1-1603* and *Hsf1-AEWL*. Each transition mutation produced a missense mutation in  
232 a highly conserved amino acid located in the CHASE (cyclases/histidine-kinase-  
233 associated sensory) domain of the ZmHK1 protein, where CK binding occurs (Figure  
234 1D) (Hothorn et al., 2011; Steklov et al., 2013). The *Hsf1-1595* mutation changed  
235 proline 190 to leucine (CCA>CTA), the *Hsf1-1603* mutation changed glutamate 236 to  
236 lysine (GAG>AAG), and the *Hsf1-AEWL* mutation changed leucine 238 to phenylalanine  
237 (CTT>TTT). The missense mutation in *Hsf1-AEWL* is particularly significant because  
238 this is the same type of amino acid substitution, although at a slightly different position  
239 in the CHASE domain, which was found in another gain-of-function mutation in a CK  
240 receptor, the *spontaneous nodule formation2 (snf2)* mutation in the lotus *Lhk1* receptor,  
241 (Figure 1D) (Tirichine et al., 2007). The *snf2* mutation was shown to cause mutant  
242 LHK1 to signal independent of the CK ligand in a heterologous signaling assay  
243 suggesting the *snf2* mutation locked LHK1 in an active signaling state (Tirichine et al.,  
244 2007). Based on the location and nature of the amino acid substitutions in the three  
245 *Hsf1* mutations and the presumed mode of action of the *snf2* mutation in *Lhk1*, we  
246 hypothesized that the *Hsf1* mutations might also lock the ZmHK1 receptor in an active  
247 CK signaling state and signal independent of CK.

248

249 **The *Hsf1* mutant CK receptors have altered histidine kinase signaling and ligand**  
250 **binding activities**

251 To determine if the *Hsf1* mutant receptors are signaling independent of CK, we utilized  
252 a heterologous histidine kinase signaling assay system developed in the yeast  
253 *Saccharomyces cerevisiae* (Suzuki et al., 2001). In the yeast assay, the cognate his-  
254 kinase of an endogenous two-component phosphorelay signal transduction system was  
255 deleted. Functional replacement of the endogenous his-kinase with the assayed CK  
256 receptor, in this case ZmHK1, allowed the activity of the receptor to be determined as  
257 the output of the endogenous yeast transduction system, which is the ability to grow on  
258 glucose media (Suzuki et al., 2001). We engineered the exact point mutation found in  
259 each *Hsf1* mutation into the *ZmHK1* cDNA in the p415CYC-ZmHK1 plasmid for  
260 expression in yeast (Suzuki et al., 2002; Higuchi et al., 2009). We next tested receptor  
261 activity in the *sln1* deletion yeast strain TM182 carrying each of the *Hsf1* missense  
262 mutations, the wild type *ZmHK1* cDNA, and the empty p415CYC vector grown on  
263 glucose media with and without the CK ligand (Figure 1E). As expected, the wild type  
264 ZmHK1 strain only grew well on glucose media supplemented with higher  
265 concentrations of the three CKs tested (Figure 1E) and, at lower CK concentrations,  
266 only grew robustly on glucose with the preferred ligand *N*<sup>6</sup>-( $\Delta^2$ -isopentenyl) adenine (iP)  
267 (Supplemental Figures 3A to 3C). In the absence of added CK, strains carrying either  
268 ZmHK1-AEWL or ZmHK1-1603 grew robustly on glucose media (Figure 1E). This  
269 result indicated that the ZmHK1-AEWL and ZmHK1-1603 receptors signaled  
270 independent of added CK in this assay. To determine if the mutant receptors were still  
271 CK responsive, they were also grown on glucose media supplemented with the three  
272 tested CKs (Figure 1E). Growth on glucose supplemented with different CKs did not  
273 reveal any receptor activity differences between ZmHK1-AEWL and ZmHK1-1603.  
274 Surprisingly, growth of the ZmHK1-1595 strain was different than the other two mutant  
275 receptors and wild type. The ZmHK1-1595 strain did not grow on glucose media  
276 without added CK, similar to wild type ZmHK1 (Figure 1E). Instead, the ZmHK1-1595  
277 strain showed strong growth on glucose media with 10  $\mu$ M of the preferred CK iP and

278 weaker growth on glucose with 10  $\mu$ M of two other bioactive CKs, *trans*-zeatin (tZ) and  
279 *cis*-zeatin (cZ), suggesting ZmHK1-1595 had weak receptor activity in this assay (Figure  
280 1E

281

282 To investigate ligand specificity differences, CK ligand binding affinities were  
283 determined for the mutant and wild type receptors (Romanov et al., 2005; Lomin et al.,  
284 2011). Affinities were determined for 6 different CKs and adenine (Ade) using two  
285 binding assays with receptors expressed in bacterial spheroplasts (Romanov et al.,  
286 2005) or residing in tobacco membranes after transient expression *in planta* (Lomin et  
287 al., 2015, 2011). The ligand preferences for the wild type ZmHK1 receptor were  
288 comparable to those determined previously (Table 1) (Lomin et al., 2015, 2011). The  
289 mutant receptors, on the other hand, all showed increased affinities for most of the CKs  
290 tested (Table 1). The preference ranking of the mutant receptors for different CKs was  
291 mostly similar to wild type (Supplemental Figure 4) but the affinities were increased  
292 between 2- to 8-fold (Table 2). The only exception was the affinity for the synthetic CK  
293 thidiazuron, which was reduced for all the mutant receptors compared to wild type  
294 ZmHK1. Thus, the missense mutations in the *Hsf1* alleles increased the relative binding  
295 affinity of the receptor for all the natural CKs tested, suggesting the mutant receptors  
296 might be hypersignaling.

297

## 298 **The *Hsf1* missense mutations localize near the CK binding pocket in ZmHK1**

299 To gain better insight into how each *Hsf1* missense mutation might impact CK binding,  
300 we determined the effect these mutations had on the structure of the CHASE domain,  
301 which was facilitated by the publication of the crystal structure of the *Arabidopsis*  
302 *thaliana histidine kinase4 (AHK4)* gene CHASE domain (Hothorn et al., 2011). *AHK4* is  
303 co-orthologous to *ZmHK1* (69% identical and 83% similar within 245 residues of the  
304 CHASE domain) and three other paralogous histidine kinases in the maize genome  
305 (Steklov et al., 2013). To explore the effects of the *Hsf1* mutations on receptor

306 structure, homology modeling was used first to model the 3D structure of the CHASE  
307 domain of ZmHK1 using the structure of AHK4. This was done with and without CK  
308 occupying the binding pocket, which did not change the results. Given the high degree  
309 of amino acid identity between ZmHK1 and AHK4, the ZmHK1 CHASE domain  
310 structure was resolved with high confidence. Next, each mutant receptor was modeled  
311 based on the derived ZmHK1 structure. The models were subjected to dynamics  
312 simulation with appropriate solvation (see Methods). The results of homology modeling  
313 showed that the amino acids mutated in each *Hsf1* allele do not occur within the CK  
314 binding pocket (Figure 1F) and thus do not contribute to direct polar contacts with the  
315 ligand. Instead, each altered residue is located near a loop domain that forms one face  
316 of the binding cavity. An indication of how the mutated residues at these positions  
317 might affect ligand binding was provided by the structure model of the ZmHK1-1603  
318 receptor. The residue altered in ZmHK1-1603 is E236, which is predicted to form an  
319 ion-pair interaction with R192 located in the loop domain. This polar interaction may  
320 help to stabilize the position of the loop domain (Figure 1F). The *Hsf1-1603* mutation  
321 converts E236 to K, a negative to positive residue change, which is expected to break  
322 the polar interaction with R192 and possibly destabilize the position of the loop due to  
323 the nearness of the two positively charged residues. Altering the position of the loop  
324 may change the overall conformation of the ligand binding pocket and, thus, account for  
325 differences in ligand binding affinities. The missense residues in the other two mutant  
326 receptors could potentially alter the conformation of the CK binding pocket via a  
327 different mechanism, although our modeling results did not reveal an obvious one.

### 328 **Exogenous CK treatment recapitulated the *Hsf1* phenotype**

329 The biochemical and structural analyses suggested the *Hsf1* mutant receptor might be  
330 hypersignaling the perception of CK which altered leaf development. To test the idea  
331 that increased CK signaling could produce *Hsf1*-like phenotypes, wild type, B73 inbred  
332 seeds were transiently treated with the CK 6-benzylaminopurine (6-BAP). The embryo  
333 in a mature maize seed possesses about 5 leaf primordia and it is these primordia  
334 which experienced the hormone treatment (Kerstetter and Poethig, 1998). Imbibed  
335 seeds were treated for 6 days with 10  $\mu$ M 6-BAP, rinsed and transplanted to soil (see

336 Methods). After growth for 3-weeks, the first 4 seedling leaves were examined for  
337 developmental changes (Figures 2A to 2E). Similar to *Hsf1*, 100% of the CK treated  
338 B73 seeds produced smaller seedling leaves covered with abundant macrohairs  
339 (Figures 2A to 2E). Leaf sheath length, blade length and blade width were reduced by  
340 10% to 20% for leaf 3, similar to leaf size reductions in the *Hsf1* seedlings (Figure 2C).  
341 In addition, macrohair density increased on the abaxial sheath, near the auricle, on the  
342 adaxial blade, and blade margins in 100% of the CK-treated B73 seedlings (Figures 2D  
343 to 2E). This pattern of ectopic macrohair formation was similar to that seen in *Hsf1*  
344 seedlings (Bertrand-Garcia and Freeling, 1991a). In addition to alterations in leaf size  
345 and pubescence, nearly 20% of the CK treated B73 seeds produced seedlings with  
346 prongs on leaf 4 (Figures 2F). This was in contrast to *Hsf1* seedlings where prongs  
347 rarely, if ever, developed on leaf 4 (Supplemental Figure 1C). Increasing the  
348 concentration of exogenous 6-BAP to 100  $\mu\text{M}$  increased the number of B73 seedlings  
349 with prongs on leaf 4 to nearly 90% (Figure 2F) Thus, transient, exogenous CK  
350 treatment recapitulated three prominent aspects of the *Hsf1* phenotype: reduced leaf  
351 size, increased macrohair abundance, and formation of prongs on blade margins,  
352 confirming these developmental changes can be induced by CK.

353 If CK hypersignaling in *Hsf1* was due to increased ligand affinity, then we would  
354 expect *Hsf1* to be hypersensitive to CK treatment. To test this idea, we performed six-  
355 day treatments on segregating *Hsf1-1603/+* seeds using 0.1  $\mu\text{M}$  CK, a concentration  
356 that did not elicit leaf size changes in B73 inbred seed (Supplemental Figure 5A). To  
357 distinguish segregating heterozygous *Hsf1* plants from wild type sib plants, PCR  
358 genotyping was used to detect a size polymorphism in the *Hsf1-1603* allele  
359 (Supplemental Table 3). After CK treatment, seedlings were grown for 3 weeks, after  
360 which, leaf phenotypes were measured. While 0.1  $\mu\text{M}$  CK treatment had no effect on  
361 wild type sibling leaf size (Supplemental Figure 5A), it did reduce the leaf size of *Hsf1-1603/+*  
362 plants 10% to 30% (Supplemental Figure 5B). Thus, *Hsf1-1603/+* seedlings  
363 were responsive to a lower concentration of CK that did not elicit a response in wild type  
364 sib or B73 inbred seedlings. Treatment with 10  $\mu\text{M}$  6-BAP was also used to assess  
365 effects on prong and macrohair formation in *Hsf1-1603/+* plants. Similar to earlier

366 results (Supplemental Figure 1C), seedlings from control water-treated *Hsf1-1603/+*  
367 seeds first formed prongs on leaf 5 (ca. 5%) or leaf 6 (ca. 25%) but never on earlier  
368 arising leaves (Figure 2G to 2I). In fact, about 60% of *Hsf1-1603/+* seedlings normally  
369 first formed prongs on leaves arising on or after leaf 7 (Figure 2H). By contrast, of the  
370 10  $\mu$ M 6-BAP treated *Hsf1-1603/+* seeds, nearly 60% produced seedlings where prongs  
371 first formed on leaf 4 and only about 30% formed prongs on leaves arising on or after  
372 leaf 7 (Figures 2G to 2I). In addition, macrohair abundance appeared increased for CK-  
373 treated *Hsf1-1603/+* compared to control *Hsf1-1603/+* or 6-BAP treated wild type sib  
374 seedlings but this was not measured (Figure 2J). Thus, CK treatment of *Hsf1* resulted  
375 in earlier arising and enhanced mutant phenotypes, indicating the mutation was  
376 hypersensitive to the CK hormone, consistent with the biochemical analysis of the  
377 mutant receptor.

378

### 379 **CK responsive genes are up-regulated in *Hsf1* leaf primordia**

380 Based on the *Hsf1* mutant plant phenotypes, we presumed that hypersignaling in  
381 developing leaf primordia gave rise to the alterations in P-D leaf patterning and other  
382 phenotypes. To test this idea, we determined the expression of *ZmHK1* and several CK  
383 responsive genes in *Hsf1-1603/+* and wild type sibling plants. Published qPCR and *in*  
384 *silico* expression analyses  
385 ([https://www.maizegdb.org/gene\\_center/gene/Zm00001d017977#rnaseq](https://www.maizegdb.org/gene_center/gene/Zm00001d017977#rnaseq)) indicated  
386 *ZmHK1* was expressed broadly across several tissues including leaves, roots, stem,  
387 and tassel (Yonekura-Sakakibara et al., 2004). We reverse transcribed cDNA from  
388 three tissues, shoot apices (shoot apical meristem plus 3 youngest leaf primordia),  
389 immature leaf, and mature green leaf from two-week old seedlings. Using quantitative  
390 PCR (qPCR) we assessed expression in plants heterozygous for the three *Hsf1* alleles  
391 compared to their wild type sibs (Figure 3A). We did not detect an increase in *ZmHK1*  
392 transcript accumulation in the *Hsf1/+* mutants compared to their wild type controls.  
393 Next, we examined expression of CK-responsive genes; two type-A response  
394 regulators, *ZmRR3* and *ZmRR6*, and a cytokinin oxidase gene, *ZmCKO4b* (Asakura et

395 al., 2003; Giulini et al., 2004). We found increased transcript accumulation for all three  
396 CK-responsive genes in the *Hsf1/+* mutants, although there was some inconsistencies  
397 across genotypes and tissues (Figure 3A).

398 Using *in situ* hybridization, we assessed transcript localization of *ZmHK1* and  
399 *ZmRR3* in wild type and *Hsf1-1603/+* shoot apices (Figure 3B). The *ZmHK1* transcript  
400 was found to be distributed broadly within developing leaf primordia and shoot apices in  
401 both genotypes (Figure 3B). As was demonstrated previously, *ZmRR3* was expressed  
402 in a specific wedge-shaped domain in the apical meristem in both longitudinal and  
403 transverse sections of wild type apices but no signal was detected in leaf primordia  
404 (Figure 3B) (Giulini et al., 2004). However, the spatial expression of *ZmRR3* was  
405 expanded in *Hsf1-1603/+* apices. Strong *ZmRR3* expression was visible in its normal  
406 meristem domain but signal was also detected in leaf primordia and was particularly  
407 evident at the margins (Figure 3B). Given the expanded pattern of *ZmRR3* expression  
408 in *Hsf1-1603/+* leaf primordia margins and that *ZmRR3* expression is CK responsive,  
409 we interpreted this to indicate increased CK signaling in the tissue where prongs will  
410 form.

411

### 412 **Mutation of *ZmRR3*, a negative regulator of CK signaling, enhances the *Hsf1*** 413 **phenotype**

414 To test if the increased transcript accumulation of the CK responsive genes was  
415 biologically relevant, we made use of a null allele of *ZmRR3*, also known as *aberrant*  
416 *phyllotaxy1* (*abph1*). Plants homozygous for the recessive *abph1* reference allele have  
417 an altered phyllotactic pattern and develop leaves paired 180° at each node instead of  
418 having the normal alternating pattern (Figures 4A to 4B) but have no P-D patterning  
419 defects (Jackson and Hake, 1999). Backcross families were produced which  
420 segregated four phenotypes – wild type, heterozygous *Hsf1-1603*, homozygous *abph1*,  
421 and heterozygous *Hsf1-1603* plus homozygous *abph1* – in equal frequencies (Figures  
422 4A to 4B). Double mutant plants, heterozygous for *Hsf1* and homozygous for *abph1*,

423 had paired leaf phyllotaxy and a strongly enhanced *Hsf1* phenotype, including very  
424 stunted stature, increased shoot branching, very slow growth, extremely short and  
425 narrow leaves, and severe leaf patterning defects including abundant prongs and bi- or  
426 trifurcation of leaf blades (Figure 4B). The synergistic interaction of *Hsf1* and *abph1*  
427 was consistent with *ZmRR3* functioning as a negative regulator of CK signaling and  
428 indicated the loss of *abph1* function enhanced the *Hsf1* phenotype.

429

## 430 **DISCUSSION**

### 431 **CK influences specific developmental programs in maize leaves**

432 In this study we showed that the *Hsf1* mutation conditions a CK hypersignaling  
433 phenotype that has multiple effects on plant growth and development, including specific  
434 effects on (i) leaf patterning, (ii) leaf size and (iii) leaf epidermal cell fate (Bertrand-  
435 Garcia and Freeling, 1991a). Supporting this idea, we also show exogenous CK  
436 treatment of wild type maize seeds produced similar changes in these developmental  
437 programs. Prominent among the developmental changes was a specific alteration in P-  
438 D leaf patterning where ectopic outgrowths with proximal identity (prongs) formed in the  
439 distal blade (Figures 1A to 1C and Supplemental Figure 2A). Although growth along the  
440 P-D axis is fundamental to normal leaf development and morphology, its molecular  
441 control has not been fully characterized. In eudicots, the activities of several  
442 transcription factor genes, such as, *BLADE ON PETIOLE1* (*BOP1*), *LEAFY PETIOLE*  
443 (*LEP*), and *JAGGED* (*JAG*), have been linked to the control of P-D leaf development  
444 (van der Graaff et al., 2000, 2003; Ha et al., 2004; Ohno et al., 2004; Norberg et al.,  
445 2005). *BOP* genes have also been shown to influence P-D leaf patterning in monocots  
446 like barley and recently, the activity of three, redundant *OsBOP* genes was shown to be  
447 required for sheath identity in rice (Tavakol et al., 2015; Toriba et al., 2019). In several  
448 monocots, the misexpression of several class I *knox* genes perturb P-D patterning by  
449 potentially altering phytohormone ratios in developing leaf primordia (Reiser et al., 2000;  
450 Schneeberger et al., 1995; Foster et al., 1999b; Ramirez et al., 2009). Our analysis of



451 *Hsf1*, the second characterized mutation of a maize CK signaling gene, has uncovered  
452 a connection between CK and the specification of P-D leaf patterning that is consistent  
453 with this hypothesis. How CK drives prong formation is not clear, although the interplay  
454 of CK and GA are known to control the degree of leaf complexity in eudicots like  
455 *Arabidopsis* and tomato, through the specification of marginal lobes or leaflets (Jasinski  
456 et al., 2005; Bar and Ori, 2015). Whether there is any overlap between the  
457 mechanism(s) of prong formation in *Hsf1* and leaflet formation in species like tomato will  
458 require further analysis. Prong formation itself appears developmentally regulated as  
459 prong initiation seems to be coordinated with formation of the ligule suggesting the  
460 signals establishing the P-D axis might be transmitted across the entire leaf primordium  
461 (Supplemental Figures 1D to 1E). Moreover, prong formation is not random as prongs  
462 form only within a certain domain of the blade, with the largest prongs forming more  
463 basally (Supplemental Figures 2D to 2F). Intriguingly, this prong-formation region has  
464 some overlap with the domain of the leaf blade deleted by mutation of the duplicate  
465 *wuschel-related homeobox (wox)* genes *narrow sheath1* and *narrow sheath2*  
466 (Nardmann et al., 2004). This implies that the marginal domain specified by these  
467 duplicate *wox* transcription factors may provide a permissive context for prongs to form.  
468 This hypothesis can be tested by analysis of prong formation in the triple mutant.

469 Leaf sheath and blade length, and blade width were reduced in *Hsf1*  
470 heterozygotes compared to wild type sib plants at seedling and mature growth stages,  
471 consistent with previous reports, and CK treatment recapitulated this phenotype in wild  
472 type inbred seedlings (Figures 2A to 2C) (Bertrand-Garcia and Freeling, 1991b). Since  
473 CK activity typically promotes cellular proliferation, how CK hypersignaling reduces  
474 growth in the shoot is not known, although increased CK signaling is known to reduce  
475 root growth (Werner et al., 2001, 2003). Typically, reducing CK accumulation or  
476 signaling results in smaller leaves and other above ground organs, suggesting  
477 increased CK activity might be expected to enhance growth (Werner et al., 2001;  
478 Nishimura et al., 2004). Growth of the maize leaf is organized linearly along its  
479 longitudinal axis into distinct zones of cell division, cell expansion and differentiation  
480 (Freeling and Lane, 1992). Recent transcriptome, proteome and hormone profiling

481 studies have enumerated multiple regulatory pathways controlling the size of and  
482 transitions between the different growth zones, with GA playing a prominent role (Li et  
483 al., 2010; Nelissen et al., 2012; Facette et al., 2013). How increased CK signaling  
484 impacts these growth zones to determine final leaf size will require further analysis  
485 building upon these previous studies.

486 In addition to a change in P-D patterning and reduction in leaf size, the *Hsf1*  
487 mutation and CK treatment of wild type seed promoted increased macrohair formation  
488 in the leaf epidermis (Figures 2D to 2E and 2J). Macrohairs are normally found on adult  
489 leaves on the abaxial sheath, at high density near the ligule but declining basipetally, on  
490 the adaxial blade and along the blade margin. *Hsf1* increased macrohair production not  
491 only on the abaxial sheath, adaxial blade, auricle and blade margins of adult leaves but  
492 also on juvenile and transitional leaves which are typically glabrous. CK treatment  
493 phenocopied the increased pubescence phenotype of *Hsf1* (Figures 2D to 2E). The  
494 epidermis of the maize leaf has three types of pubescence – bicellular microhairs,  
495 macrohairs and prickly hairs – with macrohairs being the most prominent (Freeling and  
496 Lane, 1992). Macrohairs form by differentiation of specialized epidermal cells organized  
497 in patterned files beginning in the fifth or sixth leaf (Moose et al., 2004). Little is known  
498 regarding the signals specifying macrohair formation, although a recessive mutation  
499 affecting macrohair initiation, *macrohairless1*, has been reported (Moose et al., 2004).  
500 By contrast, trichome differentiation in the leaves of eudicots, like Arabidopsis, is known  
501 to be controlled by a core network of positive and negative transcriptional regulators  
502 (Ishida et al., 2008; Grebe, 2012; Pattanaik et al., 2014). And trichome initiation on the  
503 inflorescence organs in Arabidopsis is jointly stimulated by the activity of CK and GA,  
504 and downstream transcription factors (Gan et al., 2007; Zhou et al., 2013). The  
505 increase in macrohair formation mediated by CK treatment or the *Hsf1* mutant suggests  
506 CK can reprogram epidermal cell fate in maize leaves as well.

507

508 **Missense Mutations in the Maize CK Receptor ZmHK1 underlie the *Hsf1***  
509 **phenotype**

510 Our data indicate gain-of-function mutations of the maize CK receptor *ZmHK1* underlie  
511 the semi-dominant *Hsf1* mutations. CK signaling, which is well described (To and  
512 Kieber, 2008; Hwang et al., 2012), regulates several developmental and physiological  
513 processes, although influences on leaf patterning are not among them. For example,  
514 combinations of loss of function mutations of the three Arabidopsis CK receptors  
515 demonstrate this gene family has partially overlapping and redundant functions in the  
516 control of shoot and root growth, seed size, germination and leaf senescence (Higuchi  
517 et al., 2004; Nishimura et al., 2004; Riefler et al., 2006). CK receptors were shown to  
518 also possess phosphatase activity by analysis of a specific mutation of *AHK4/CRE1*, the  
519 recessive *wooden leg (wol)* allele (*CRE1 T278I*) (Mahonen et al., 2006). Plants  
520 homozygous for the *wol* allele have abnormal root vascular development due to the  
521 dose-dependent constitutive phosphatase activity of this allele. A gain-of-function  
522 mutation in the CHASE domain of *AHK3 (ore12-1)* revealed this receptor plays a major  
523 role in CK-mediated leaf senescence; although how this mutation affected receptor  
524 activity was not explored (Kim et al., 2006). The study of gain-of-function mutations has  
525 revealed additional information on CK receptor function. Novel, dominant, missense  
526 mutations in *AHK2* and *AHK3*, the *repressor of cytokinin deficiency* alleles (*rock2* and  
527 *rock3*) enhanced CK signaling, increased CK hypersensitivity, and increased transcript  
528 accumulation of CK-responsive genes, similar to the *Hsf1* mutations (Figure 3) (Bartrina  
529 et al., 2017). In contrast, the *rock* mutations had the opposite effect on phenotype  
530 compared to *Hsf1*, producing early flowering, enlarged rosette leaves and shoots, and  
531 longer roots. The contrasting phenotypic effects might be due to differences in signaling  
532 strength between the *rock* and *Hsf1* mutations or reflect differences in the downstream  
533 circuitry between the two species.

#### 534 **Mutations near the CK binding pocket alter ligand affinity and receptor signaling**

535 To clarify how the function of *ZmHK1* was altered in the *Hsf1* mutants, we  
536 analyzed their activity in heterologous his-kinase signaling and ligand binding assays.  
537 Our results indicate two of the *Hsf1* mutant receptors signal independent of added CK in  
538 yeast and all three have increased binding affinities for the natural CKs tested (Figure  
539 1E and Table 1). The mutant receptors may be in a “locked on” state, similar to what

540 was hypothesized for the *snf2* mutation or the increased ligand affinities of the *Hsf1*  
541 receptors may explain their ability to signal independent of CK action. We favor the  
542 second idea and think the increased CK affinity explains the ability of the mutant  
543 receptors to signal in heterologous hosts. Many microbes, including *E. coli* and yeast,  
544 contain low concentrations of iP as a normal constituent of tRNA which can become  
545 free due to tRNA decay (Skoog and Armstrong, 1970; Hall, 1973; Romanov, 1990; Mok  
546 and Mok, 2001). The three mutant receptors all have increased affinity for iP (Table 2).  
547 This stronger affinity may be due to stronger complex formation, or longer receptor  
548 occupancy and, as a consequence, stronger signaling even in the presence of low iP  
549 concentration. Thus, the ability of the ZmHK1-AEWL and ZmHK1-1603 receptors to  
550 signal in yeast without added CKs may be due to their increased affinity for iP already  
551 present at low concentration in yeast cells (Figure 1E). In fact, it has been shown that  
552 expressing other HK receptors in the *sln1* deletion yeast strain TM182 permits this  
553 strain to grow on glucose without added CKs, albeit at a much slower rate than with  
554 CKs present, and recombinant HKs synthesized in *E. coli* cannot be crystalized without  
555 iP complexed in the binding pocket (Higuchi et al., 2009; Hothorn et al., 2011). Since all  
556 three mutant receptors have increased ligand affinities (Table 1), have nearly identical  
557 mutant plant phenotypes in several different genetic backgrounds (Figure 1 and  
558 Supplemental Table 1), and show similar misexpression patterns of CK responsive  
559 genes (Figures 3A) we conclude all three *Hsf1* mutant receptors function similarly *in*  
560 *planta*.

561 Our structural analysis localized each residue mutated in *Hsf1* to the ligand-  
562 binding Per-Arnt-Sim-like (PAS) subdomain of the CHASE domain in ZmHK1 (Figure  
563 1F) (Steklov et al., 2013; Hothorn et al., 2011). Notably, none are within the CK binding  
564 pocket or predicted to make contact with the ligand. Rather all are located near a loop  
565 domain comprising one face of the pocket suggesting interactions with this loop may  
566 affect the binding pocket resulting in increased ligand affinity. Interestingly, amino acid  
567 substitutions that rendered *AHK4* constitutively active in a heterologous *E. coli* his-  
568 kinase assay were located downstream of the CHASE domain in the second  
569 transmembrane domain and near the kinase domain (Miwa et al., 2007). In addition,

570 none of the *rock* mutations are located in the ligand-binding PAS domain (Bartrina et al.,  
571 2011). Rather two are in the N-terminal  $\alpha$ -helices and one is in the C-terminal  
572 transmembrane domain. Therefore, further structure-function studies will be needed to  
573 define which residues are crucial for activity and to resolve the precise mechanism(s) by  
574 which individual missense mutations alter ligand binding and receptor signaling.

### 575 ***Hsf1* affects downstream components of CK signaling**

576 More ZmHK1 signaling in developing *Hsf1* leaf primordia resulted in increased  
577 transcript accumulation of several early CK response genes in all three *Hsf1* mutant  
578 alleles (Figure 3A). Although not all CK reporters responded the same within an allele  
579 or tissue, overall our data are consistent with *Hsf1* upregulating CK responsive genes.  
580 The most consistent effect was upregulation of *ZmRR3* where its normally meristem-  
581 confined expression was expanded in *Hsf1-1603* to include expression near newly  
582 arising leaf primordia and in primordia margins (Figure 3B). Notably, the increased CK  
583 signaling reported by *ZmRR3* marks the margins of early stage leaf primordia (Figure  
584 3B) which is where prongs will form later in development (Supplemental Figures 1F to  
585 1G). Although we found ectopic *ZmRR3* signal along the entire margin, outgrowths do  
586 not emanate from the entire blade margin but, rather, occur sporadically, with  
587 outgrowths interspersed with regions of normal blade margin (Figures 1B to 1C and  
588 Supplemental Figure 2A). This observation suggests even though CK hypersignaling  
589 can promote proximalization of blade margin cells, not all cells at the margin are  
590 competent to respond to this signal. Double mutants heterozygous for *Hsf1-1603* and  
591 homozygous for *abph1*, a null allele of *ZmRR3*, show a synergistic interaction (Figures  
592 4A to 4B). Several type-A RRs function to negatively regulate CK signal transduction,  
593 as well as, regulate circadian rhythms, phytochrome function and meristem size (To et  
594 al., 2004). The increased severity of growth defects in *Hsf1* heterozygotes which lack  
595 *abph1* activity suggests upregulation of *ZmRR3* (*abph1*) partially ameliorates CK  
596 hypersignaling. This also suggests that *ZmRR3* normally functions to attenuate CK  
597 signal transduction in maize shoot apices, in addition to specifying leaf phyllotaxy.

598 The identification of the CK receptor *ZmHK1* as the gene underlying the leaf  
599 patterning *Hsf1* mutation adds to our understanding of the role CK can play in basic  
600 developmental programs. Future studies to determine the molecular determinants  
601 functioning downstream of CK signaling that promote prong formation should illuminate  
602 mechanisms important for developmental reprogramming and cell fate acquisition.

## 603 **METHODS**

### 604 **Plant Material, Genetics, Phenotypic Measurements, and Analysis.**

605 The *Hsf1-1595*, *Hsf1-1603* and *Hsf1-2559* mutants arose via EMS mutagenesis  
606 of the inbred Mo17 and seed was obtained from the Maize Genetic Cooperation Stock  
607 Center (<http://maizecoop.cropsci.uiuc.edu/>). *Hsf1-AEWL* arose via EMS mutagenesis of  
608 the inbred A619 and *Hsf1-7322* via EMS mutagenesis of the inbred A632 in  
609 independent screens. Homozygous *Hsf1* mutants of all five alleles were identified for  
610 sequence analysis from progeny of self-pollinated heterozygous B73 introgressed  
611 plants by phenotype and also by PCR screening of linked sequence polymorphisms  
612 unique to the progenitor inbred lines and the backcross inbred B73. Since *Hsf1-1595*  
613 and *Hsf1-1603* were the same transition mutations as *Hsf1-7322* and *Hsf1-2559*,  
614 respectively, further analysis was only performed on three mutants: *Hsf1-1595*, *Hsf1-1603*  
615 and *Hsf1-AEWL*. All phenotypic, molecular and epistatic analyses were  
616 performed on the three alleles that had been backcrossed a minimum of six times to the  
617 inbred B73. The *Hsf1* phenotype of the three alleles was fully penetrant as a  
618 heterozygote in all backcross generations. Progeny from self- or sib-pollinated *Hsf1*  
619 heterozygotes of the three alleles segregated 25% severely stunted, very slow growing,  
620 multi-shoot plants that only survived when grown in the greenhouse but were sterile.  
621 The *abph1* mutant seed was backcrossed a minimum of three times to the inbred B73  
622 before making the double mutant family segregating with *Hsf1-1603*. *Hsf1-1603*  
623 heterozygotes were crossed by *abph1* homozygotes and double heterozygous progeny  
624 plants were backcrossed by *abph1* homozygotes creating double mutants families  
625 segregating 25% +/+, *abph1*/+ (WT); 25% +/+, *abph1/abph1* (single *abph1* mutant);  
626 25% *Hsf1*/+, *+/abph1* (single *Hsf1* mutant); and 25% *Hsf1*/+, *abph1/abph1* (double *Hsf1*

627 *abph1* mutant). Allele specific PCR genotyping was done to confirm phenotypes of  
628 *Hsf1* heterozygotes and *abph1* heterozygotes and homozygotes (Supplemental Table  
629 3).

630 Measurement of adult plant traits of the three *Hsf1* mutant alleles was performed  
631 on field grown families segregating 50% wild type: 50% *Hsf1* heterozygotes.  
632 Measurements were taken on 7-11 plants of each genotype in 1-row plots with two  
633 biological replicates. For analysis of prong position, prong size and percent prong  
634 margin, the third leaf above the ear of adult *Hsf1* heterozygous plants was collected  
635 from 1-row plots of field grown plants in three replicates in summer 2013.  
636 Approximately, 6 to 10 leaves were collected per plot for each allele. For each leaf,  
637 measurements were made for (1) total blade length, (2) prong position by measuring the  
638 distance from the base of the blade to the mid-point of each prong on each blade  
639 margin, and (3) prong size by measuring from the basal to the distal position along the  
640 margin where proximal tissue emerged from the blade for each prong (Figure 1B).  
641 Percent prong margin was defined as the proportion of leaf blade margin that is  
642 occupied by tissue having proximal (sheath, auricle and/or ligule) identity and was  
643 calculated by summing the size of all prongs from both sides of the leaf blade divided by  
644 twice the length of the leaf blade.

645 Analysis of prong position, prong size and the relationship between prong  
646 position and size was estimated with kernel smoothing methods (Silverman, 1986;  
647 Wand and Jones, 1995). For all cases a Gaussian kernel was used and the data  
648 reflection method was applied for boundary correction since both position and size are  
649 positive variables. The bandwidth were selected using least squares cross validation  
650 (Bowman, 1984). All computations were performed using R software, kernel density  
651 estimation was performed using the *ks* package (Duong, 2007) and figures were  
652 created with the *ggplot2* package (Wickham, 2009).

653

654 **Map-based cloning of *Hsf1*.**

655 *Hsf1-1595* was introgressed into B73 and crossed to PRE84 to generate a BC1  
656 mapping population. Genetic mapping with 96 BC1 individuals defined *Hsf1* between  
657 two SNP markers on chr5: PHA12918-F (204590502 bp, B73 RefGen\_v2) and  
658 PHA5244-F (206614542 bp, B73 RefGen\_v2). The two flanking markers were used to  
659 screen a BC1 population of 1500 individuals from B73\_*Hsf1* x A632 and 1600 individual  
660 from B73\_*Hsf1* x PRE84. 224 recombinants were identified, and these individuals were  
661 used for further fine mapping. Additional markers derived from the *Hsf1* interval were  
662 developed and used to fine map the *Hsf1* mutation with the recombinants, as described  
663 in Jiang et al., 2012 (Jiang et al., 2012). The gene underlying the *Hsf1* mutation was  
664 finally delimited to a 21 kb interval, between Indel marker 410984 (205538463 bp, B73  
665 RefGen\_v2, with one recombinant between this marker and *Hsf1*) and SNP marker  
666 391087 (205559234 bp, B73 RefGen\_v2, with three recombinants between this marker  
667 and *Hsf1*). There is only one annotated gene model (B73 RefGen\_v3  
668 GRMZM2G151223, B73 RefGen\_v4 Zm00001d017977) in this interval that was also  
669 annotated in NCBI as LOC541634 *histidine kinase1*, a putative cytokinin receptor.

670

671 **Heterologous histidine kinase assays.** Signaling of the wild type and *Hsf1* mutant  
672 ZmHK1 receptors in yeast was performed as described previously (Inoue et al., 2001).  
673 The exact point mutations for each of the three *Hsf1* missense mutations were  
674 engineered into the cDNA of *ZmHK1* in the plasmid P415-CYC1-ZmHK1 plasmid with  
675 the QuikChange II Site-Directed Mutagenesis kit (Agilent Technologies) using the  
676 manufacturer's specifications.

677

678 **Cytokinin binding affinity determination.** Cytokinin binding assays were performed  
679 with recombinant maize cytokinin receptors expressed in *E. coli* cells. Spheroplasts  
680 were prepared from cell lines expressing the wild type ZmHK1, and mutant ZmHK1-  
681 AEWL and ZmHK1-1603 receptors. Competitive cytokinin binding assays were  
682 performed as previously described (Lomin et al., 2011). Transient expression of



683 receptors for the homologous binding assay was done by transformation of tobacco  
684 *Nicotiana benthamiana* as previously described (Sparkes et al., 2006). Agrobacteria *A.*  
685 *tumefaciens* carrying cytokinin receptor genes fused to GFP were grown in parallel with  
686 a helper agrobacterial strain p19 (Voinnet et al., 2003). Five to six week old tobacco  
687 plants were infiltrated with the mixture of two agrobacterial strains and the expression  
688 level of receptor genes was checked after 4 days using a confocal microscope. For  
689 those cases with sufficient expression, leaves were processed further for plant  
690 membrane isolation. For plant membrane isolation, all manipulations were done at 4  
691 °C. Tobacco leaves were homogenized in buffer containing 300 mM sucrose, 100 mM  
692 Tris-HCl (pH 8.0), 10 mM Na<sub>2</sub>-EDTA, 0.6% polyvinylpyrrolidone K30, 5 mM K<sub>2</sub>S<sub>2</sub>O<sub>5</sub>, 5  
693 mM DTT and 1 mM PMSF. The homogenate was filtered through Miracloth  
694 (Calbiochem), and the filtrate was first centrifuged for 10 min at 10000 g, and then for  
695 30 min at 100000 g. The microsome pellet was resuspended in PBS (pH 7.4), frozen  
696 and stored at -70 °C before using.

697

#### 698 **ZmHK1 structure modeling.**

699 The amino acid sequence of the ZmHK1 CHASE domain (86-270) was obtained from  
700 the protein sequence database of NCBI (accession id: NP\_001104859). It shares 69%  
701 sequence identity with the *Arabidopsis HK4* sensor domain. The homology model for  
702 ZmHK1 was generated using Swiss model server (<http://swissmodel.expasy.org>) with  
703 the published crystal structure of AHK4 (pdb code: 3T4J) as a template. Subsequently  
704 the model was solvated and subjected to energy minimization using the steepest  
705 descent followed by conjugate gradient algorithm to remove clashes. The  
706 stereochemical quality of the ZmHK1 model was assessed using the PROCHECK  
707 program. None of the residues were in the disallowed regions of the Ramachandran  
708 map.

#### 709 **Exogenous CK treatment.**

710 Exogenous CK treatments were performed with 6-benzylaminopurine (6-BAP) (Sigma  
711 Aldrich) dissolved in 10 drops 1N NaOH and brought to 1mM concentration with distilled  
712 water. All water control treatments were done using a similar stock of 10 drops 1N  
713 NaOH and diluted in parallel to the CK stock. Further dilutions to the desired CK  
714 concentration were done with distilled water. Maize kernels were surface sterilized with  
715 two 5 minute washes of 80% ethanol followed by two 15 minute washes of 50% bleach  
716 and rinsed five times in sterile distilled water. Kernels were imbibed overnight with  
717 sterile distilled water prior to the start of the hormone treatment. For hormone  
718 treatments, 20 imbibed kernels per replicate were placed embryo-side down on two  
719 paper towels in a petri dish, covered with two more layers of paper towel and filled with  
720 15 mL of CK treatment or the water control solution. Petri dishes were sealed with  
721 parafilm and placed in a lab drawer in the dark at room temperature for 6 days. After  
722 treatment, germinating kernels were rinsed with sterile, distilled water and planted in 4  
723 cm square pots in soilless potting medium (Metro-Mix 900, SunGro Horticulture) and  
724 grown in the greenhouse (day: 16 hr./28°C, night: 8 hr./21°C) with supplemental lighting  
725 (high pressure sodium and metal halide lights) and standard light intensity ( $230 \mu\text{E m}^{-2}$   
726  $\text{s}^{-1}$  at height of 3.5 feet). Growth was monitored and leaf measurements were taken  
727 after the fourth leaf collar (auricle and ligule) had fully emerged from the whorl after 3 to  
728 4 weeks. For measurements, individual leaves were removed from the plant and each  
729 component measured. Leaf sheath length was defined as the site of insertion of the  
730 leaf base to the culm (stem) to the farthest point of sheath adjoining the ligule. Leaf  
731 blade length was defined as the most proximal point of blade adjoining the ligule to the  
732 distal blade tip. Leaf blade width was measured margin to margin at half of the leaf  
733 blade length. All leaf measurements were analyzed using JMP PRO 12 software using  
734 a student's t-test to determine significance with two comparisons, and Tukey's HSD test  
735 to determine significance with more than two comparisons. To examine macrohair  
736 abundance, epidermal impressions were made using Crazy Glue Maximum Bond®  
737 cyanoacrylate glue applied to a Fisherbrand Superfrost Plus® microscope slide. The  
738 adaxial blade of leaf one was pressed firmly into the glue for about 30 seconds, followed  
739 by immediate removal of the leaf. Slides were imaged on an Olympus BX60 light  
740 microscope.

741

742 **Expression analysis.**

743 ***In situ* hybridization:**

744 For *in situ* hybridization, we slightly modified an online protocol from Jeff Long. For  
745 complete details refer to [http://pbio.salk.edu/pbiol/in\\_situ\\_protocol.html](http://pbio.salk.edu/pbiol/in_situ_protocol.html). *In situ* probes  
746 were made using T7/SP6 promoter based *in vitro* transcription in the cloning vector  
747 pGEMT (Promega). FAA (Formaldehyde Acetic Acid) fixed and paraffin embedded  
748 maize shoot apices were sectioned at 10 µm thickness and laid on Probe-On-Plus  
749 slides (Fisher) and placed on a warmer at 42°C. After overnight incubation, the slides  
750 were deparaffinized using Histo- Clear (National Diagnostics), treated with proteinase K  
751 and dehydrated. Probes were applied on the slides and pairs of slides were  
752 sandwiched carefully and incubated at 55°C overnight. The following day the slides  
753 were rinsed and washed. Diluted (1:1250) anti-DIG-antibody (Roche) was applied to  
754 the slides and incubated for 2 hours. After thoroughly washing the slides, sandwiched  
755 slides were placed in NBT-BCIP (Roche) solution (200 µl in 10ml buffer C; 100mM Tris  
756 pH9.5/100mM NaCl/50mM MgCl<sub>2</sub>) in dark for 2 to 3 days for color development. Color  
757 development reaction was stopped using 1x Tris EDTA. The slides were mounted using  
758 Immu-Mount (Thermo Scientific) and observed and imaged under a bright field  
759 microscope.

760

761 **RT qPCR:**

762 Seedling tissue was collected from two-week old, stage V3 to V4 *Hsf1/+* and wild type  
763 sib seedlings for each allele and included (1) ca. 2 cm of mature green leaf blade from  
764 the distal half of leaf #4, (2) ca. a 2 cm cylinder of immature leaf tissue, cut ca. 1 cm  
765 above the insertion point of leaf #5 after removing leaf #4, and (3) the remaining 1 cm  
766 cylinder of tissue above the insertion point of leaf #5, consisting of the SAM, young leaf  
767 primordia and the apical part of the stem. Tissue was bulked from three different plants

768 for each biological replicate and three replicates were collected. Total RNA was  
769 extracted from these tissues using Trizol reagent, adhering to the manufacturer's  
770 protocol ([http://tools.lifetechnologies.com/content/sfs/manuals/trizol\\_reagent.pdf](http://tools.lifetechnologies.com/content/sfs/manuals/trizol_reagent.pdf)).  
771 cDNA was synthesized from total RNA using the SuperScript® III First-Strand  
772 (Invitrogen) synthesis system for reverse transcriptase PCR (RT-PCR) and oligo-d(T)  
773 primers. Quantitative real-time PCR was performed on the cDNA using an LC480  
774 (Roche) and the SYBR green assay. The primers were designed near the 3' end of the  
775 gene with an amplicon size of between 120 bp to 250 bp. Folylpolyglutamate synthase  
776 (FPGS) was used as an endogenous control as it was shown to have very stable  
777 expression across a variety of maize tissues and range of experimental conditions  
778 (Manoli et al., 2012). Two technical replicates were included for each gene.  
779 Comparative  $\Delta\Delta\text{Ct}$  method was used to calculate fold change compared to the  
780 endogenous control.  $\Delta\text{Ct}$  of mutant (*Hsf1*) and  $\Delta\text{Ct}$  of wild type (WT) was expressed as  
781 the difference in Ct value between target gene and the endogenous control.  $\Delta\Delta\text{Ct}$  was  
782 then calculated as the difference of  $\Delta\text{Ct}$  (*Hsf1*) and  $\Delta\text{Ct}$  (WT). Finally, fold change in  
783 target gene expression between *Hsf1* and WT was determined as  $2^{-\Delta\Delta\text{Ct}}$ .

784

## 785 **Acknowledgements**

786 We thank Dave Jackson (Cold Spring Harbor Labs) for the *abph1* mutant seed, Erica  
787 Unger-Wallace (Iowa State University) for technical assistance and Erik Vollbrecht  
788 (Iowa State University) for support during the early phase of this research. D.M.K.,  
789 S.N.L. and G.A.R. were partly supported by the Molecular and Cell Biology Program of  
790 the Presidium of RAS. . This work was supported by the National Science Foundation  
791 under Grant Number 1022452.

792

## 793 **Author contributions**

794 M.G.M., S.C., H.S., G.A.R., B.L. and N.B. designed research; L.M.T., S.C., J.C.,  
795 A.D.V.E., I.A., A.P., D.M.K., S.N.L., S.T., and N. M. performed research; M.G.M., H.S.,  
796 G.A.R., B.L. and N.B. analyzed data; and M.G.M. wrote the paper with input from the  
797 other authors.

798

799

800

801 **REFERENCES**

- 802 **Asakura, Y., Hagino, T., Ohta, Y., Aoki, K., Yonekura-Sakakibara, K., Deji, A.,**  
803 **Yamaya, T., Sugiyama, T., and Sakakibara, H.** (2003). Molecular characterization  
804 of His-Asp phosphorelay signaling factors in maize leaves: Implications of the  
805 signal divergence by cytokinin-inducible response regulators in the cytosol and the  
806 nuclei. *Plant Mol. Biol.* **52**: 331–341.
- 807 **Bar, M. and Ori, N.** (2015). Compound leaf development in model plant species. *Curr.*  
808 *Opin. Plant Biol.* **23**: 61–69.
- 809 **Bartrina, I., Jensen, H., Novák, O. rej, Strnad, M., Werner, T., and Schmölling, T.**  
810 (2017). Gain-of-Function Mutants of the Cytokinin Receptors AHK2 and AHK3  
811 Regulate Plant Organ Size, Flowering Time and Plant Longevity. *Plant Physiol.*  
812 **173**: 1783–1797.
- 813 **Bartrina, I., Otto, E., Strnad, M., Werner, T., and Schmölling, T.** (2011). Cytokinin  
814 Regulates the Activity of Reproductive Meristems, Flower Organ Size, Ovule  
815 Formation, and Thus Seed Yield in *Arabidopsis thaliana*. *Plant Cell Online* **23**: 69–  
816 80.
- 817 **Benjamins, R. and Scheres, B.** (2008). Auxin: The Looping Star in Plant Development.  
818 *Annu. Rev. Plant Biol.* **59**: 443–465.
- 819 **Bertrand-Garcia, R. and Freeling, M.** (1991a). Hairy-Sheath Frayed #1-O: A Systemic,  
820 Heterochronic Mutant of Maize That Specifies Slow Developmental Stage  
821 Transitions. *Am. J. Bot.* **78**: 747–765.
- 822 **Bertrand-Garcia, R. and Freeling, M.** (1991b). Hsf1-O (Hairy sheath frayed): 5L  
823 linkage data. *Maize Genet. Coop. News Lett.*: 30.
- 824 **Bird, R.M. and Neuffer, M.G.** (1985). Developmentally Interesting New Mutants in  
825 Plants Odd New Dominant Mutations Affecting the Development of the Maize Leaf.  
826 Free. M. (Ed.). Ucla (University Calif. Los Angeles) Symp. Mol. Cell. Biol. New Ser.  
827 Vol. 35. *Plant Genet. Third Annu. Arco Plant Cell Res. Institute-Ucla Symp. Plant*

- 828 Biol. Keystone, Colo., USA, Apr. 13-: 818–822.
- 829 **Bolduc, N. and Hake, S.** (2009). The Maize Transcription Factor KNOTTED1 Directly  
830 Regulates the Gibberellin Catabolism Gene *ga2ox1*. *Plant Cell* **21**: 1647–1658.
- 831 **Bowman, A.W.** (1984). An alternative method of cross-validation for the smoothing of  
832 density estimates. *Biometrika* **71**: 353–360.
- 833 **Bowman, J.L., Eshed, Y., and Baum, S.F.** (2002). Establishment of polarity in  
834 angiosperm lateral organs. *Trends Genet.* **18**: 134–141.
- 835 **Byrne, M., Timmermans, M., Kidner, C., and Martienssen, R.** (2001). Development of  
836 leaf shape. *Curr. Opin. Plant Biol.* **4**: 38–43.
- 837 **Byrne, M.E., Simorowski, J., and Martienssen, R.A.** (2002). ASYMMETRIC  
838 LEAVES1 reveals *knox* gene redundancy in *Arabidopsis*. *Development* **129**: 1957–  
839 1965.
- 840 **Du, L., Jiao, F., Chu, J., Jin, G., Chen, M., and Wu, P.** (2007). The two-component  
841 signal system in rice (*Oryza sativa* L.): A genome-wide study of cytokinin signal  
842 perception and transduction. *Genomics* **89**: 697–707.
- 843 **Duong, T.** (2007). *ks*: Kernel density estimation and kernel discriminant analysis for  
844 multivariate data in R. *J. Stat. Softw.* **21**: 1–16.
- 845 **Edgar, R.C.** (2004). MUSCLE: multiple sequence alignment with high accuracy and  
846 high throughput. *Nucleic Acids Res.* **32**: 1792–1797.
- 847 **Endrizzi, K., Moussian, B., Haecker, A., Levin, J.Z., and Laux, T.** (1996). The  
848 SHOOT MERISTEMLESS gene is required for maintenance of undifferentiated  
849 cells in *Arabidopsis* shoot and floral meristems and acts at a different regulatory  
850 level than the meristem genes *WUSCHEL* and *ZWILLE*. *Plant J.* **10**: 967–979.
- 851 **Facette, M.R., Shen, Z., Björnsdóttir, F.R., Briggs, S.P., and Smith, L.G.** (2013).  
852 Parallel Proteomic and Phosphoproteomic Analyses of Successive Stages of Maize  
853 Leaf Development. *Plant Cell* **25**: 2798–2812.
- 854 **Foster, T., Veit, B., and Hake, S.** (1999a). Mosaic analysis of the dominant mutant,  
855 *Gnarley1-R*, reveals distinct lateral and transverse signaling pathways during maize

- 856 leaf development. *Development* **126**: 305–313.
- 857 **Foster, T., Yamaguchi, J., Wong, B.C., Veit, B., and Hake, S.** (1999b). Gnarley1 Is a  
858 Dominant Mutation in the *knox4* Homeobox Gene Affecting Cell Shape and Identity.  
859 *Plant Cell* **11**: 1239–1252.
- 860 **Freeling, M. and Hake, S.** (1985). Developmental genetics of mutants that specify  
861 Knotted leaves in maize. *Genetics* **111**: 617–634.
- 862 **Freeling, M. and Lane, B.** (1992). The maize leaf. In *The Maize Handbook*, M. Freeling  
863 and V. Walbot, eds (Springer-Verlag: New York LB - PBS Record: 390), p. in  
864 press.
- 865 **Gan, Y., Liu, C., Yu, H., and Broun, P.** (2007). Integration of cytokinin and gibberellin  
866 signalling by Arabidopsis transcription factors GIS, ZFP8 and GIS2 in the regulation  
867 of epidermal cell fate. *Development* **134**: 2073–2081.
- 868 **Giulini, A., Wang, J., and Jackson, D.** (2004). Control of phyllotaxy by the cytokinin-  
869 inducible response regulator homologue ABPHYL1. *Nature* **430**: 1031–1034.
- 870 **van der Graaff, E., Dulk-Ras, A.D., Hooykaas, P.J., and Keller, B.** (2000). Activation  
871 tagging of the *LEAFY PETIOLE* gene affects leaf petiole development in  
872 *Arabidopsis thaliana*. *Development* **127**: 4971–4980.
- 873 **van der Graaff, E., Nussbaumer, C., and Keller, B.** (2003). The *Arabidopsis thaliana*  
874 *rlp* mutations revert the ectopic leaf blade formation conferred by activation tagging  
875 of the *LEP* gene. *Mol. Genet. Genomics* **270**: 243–252.
- 876 **Grebe, M.** (2012). The patterning of epidermal hairs in *Arabidopsis* — updated. *Curr.*  
877 *Opin. Plant Biol.* **15**: 31–37.
- 878 **Guo, M., Thomas, J., Collins, G., and Timmermans, M.C.P.** (2008). Direct  
879 Repression of *KNOX* Loci by the *ASYMMETRIC LEAVES1* Complex of  
880 *Arabidopsis*. *Plant Cell* **20**: 48–58.
- 881 **Ha, C.M., Jun, J.H., Nam, H.G., and Fletcher, J.C.** (2004). *BLADE-ON-PETIOLE1*  
882 encodes a BTB/POZ domain protein required for leaf morphogenesis in  
883 *Arabidopsis thaliana*. *Plant Cell Physiol* **45**: 1361–1370.



- 884 **Ha, C.M., Kim, G.T., Kim, B.C., Jun, J.H., Soh, M.S., Ueno, Y., Machida, Y.,**  
885 **Tsukaya, H., and Nam, H.G.** (2003). The BLADE-ON-PETIOLE 1 gene controls  
886 leaf pattern formation through the modulation of meristematic activity in  
887 Arabidopsis. *Development* **130**: 161–172.
- 888 **Hake, S., Sinha, N., Veit, B., Vollbrecht, E., and Walko, R.** (1991). Mutations of  
889 Knotted alter cell interactions in the developing maize leaf. In *Plant Molecular*  
890 *Biology*, R.G. Herrmann and B. Larkins, eds (Plenum Press: New York), pp. 555–  
891 562.
- 892 **Hake, S., Vollbrecht, E., and Freeling, M.** (1989). Cloning Knotted, the dominant  
893 morphological mutant in maize using Ds2 as a transposon tag. *EMBO J.* **8**: 15–22.
- 894 **Hall, R.H.** (1973). Cytokinins as a probe of developmental processes. *Annu. Rev.*  
895 *Plant Physiol.* **24**: 415–444.
- 896 **Hay, A., Barkoulas, M., and Tsiantis, M.** (2006). ASYMMETRIC LEAVES1 and auxin  
897 activities converge to repress BREVIPEDICELLUS expression and promote leaf  
898 development in Arabidopsis. *Development* **133**: 3955–3961.
- 899 **Hay, A., Kaur, H., Phillips, A., Hedden, P., Hake, S., and Tsiantis, M.** (2002). The  
900 gibberellin pathway mediates KNOTTED1-type homeobox function in plants with  
901 different body plans. *Curr Biol* **12**: 1557–1565.
- 902 **Higuchi, M. et al.** (2004). In planta functions of the Arabidopsis cytokinin receptor  
903 family. *PNAS* **101**: 8821–8826.
- 904 **Higuchi, M., Kakimoto, T., and Mizuno, T.** (2009). *Cytokinin Sensing Systems Using*  
905 *Microorganisms Plant Hormones* S. Cutler and D. Bonetta, eds (Humana Press).
- 906 **Hothorn, M., Dabi, T., and Chory, J.** (2011). Structural basis for cytokinin recognition  
907 by Arabidopsis thaliana histidine kinase 4. *Nat Chem Biol* **7**: 766–768.
- 908 **Hwang, I. and Sakakibara, H.** (2006). Cytokinin biosynthesis and perception. *Physiol.*  
909 *Plant.* **126**: 528–538.
- 910 **Hwang, I. and Sheen, J.** (2001). Two-component circuitry in Arabidopsis cytokinin  
911 signal transduction. *Nature* **413**: 383–389.

- 912 **Hwang, I., Sheen, J., and Müller, B.** (2012). Cytokinin Signaling Networks. *Annu. Rev.*  
913 *Plant Biol.* **63**: 353–380.
- 914 **Inoue, T., Higuchi, M., Hashimoto, Y., Seki, M., Kobayashi, M., Kato, T., Tabata, S.,**  
915 **Shinozaki, K., and Kakimoto, T.** (2001). Identification of CRE1 as a cytokinin  
916 receptor from Arabidopsis. *Nature* **409**: 1060–1063.
- 917 **Ishida, T., Kurata, T., Okada, K., and Wada, T.** (2008). A Genetic Regulatory Network  
918 in the Development of Trichomes and Root Hairs. *Annu. Rev. Plant Biol.* **59**: 365–  
919 386.
- 920 **Jackson, D. and Hake, S.** (1999). Control of phyllotaxy in maize by the *abphyl1* gene.  
921 *Development* **126**: 315–323.
- 922 **Jasinski, S., Piazza, P., Craft, J., Hay, A., Woolley, L., Rieu, I., Phillips, A., Hedden,**  
923 **P., and Tsiantis, M.** (2005). KNOX action in Arabidopsis is mediated by coordinate  
924 regulation of cytokinin and gibberellin activities. *Curr Biol* **15**: 1560–1565.
- 925 **Jiang, F., Guo, M., Yang, F., Duncan, K., Jackson, D., Rafalski, A., Wang, S., and**  
926 **Li, B.** (2012). Mutations in an AP2 Transcription Factor-Like Gene Affect Internode  
927 Length and Leaf Shape in Maize. *PLoS One* **7**: e37040.
- 928 **Johnston, R., Wang, M., Sun, Q., Sylvester, A.W., Hake, S., and Scanlon, M.J.**  
929 (2014). Transcriptomic Analyses Indicate That Maize Ligule Development  
930 Recapitulates Gene Expression Patterns That Occur during Lateral Organ Initiation.  
931 *Plant Cell* **26**: 4718–4732.
- 932 **Kerstetter, R., Vollbrecht, E., Lowe, B., Veit, B., Yamaguchi, J., and Hake, S.**  
933 (1994). Sequence analysis and expression patterns divide the maize *knotted1*-like  
934 homeobox genes into two classes. *Plant Cell* **6**: 1877–1887.
- 935 **Kerstetter, R.A. and Poethig, R.S.** (1998). The specification of leaf identity during  
936 shoot development. *Annu. Rev. Cell Dev. Biol.* **14**: 373–398.
- 937 **Kim, H.J., Ryu, H., Hong, S.H., Woo, H.R., Lim, P.O., Lee, I.C., Sheen, J., Nam,**  
938 **H.G., and Hwang, I.** (2006). Cytokinin-mediated control of leaf longevity by AHK3  
939 through phosphorylation of ARR2 in Arabidopsis. *PNAS* **103**: 814–819.
- 940 **Li, P. et al.** (2010). The developmental dynamics of the maize leaf transcriptome. *Nat.*

- 941 Genet. **42**: 1060–1067.
- 942 **Lomin, S.N., Krivosheev, D.M., Steklov, M.Y., Arkhipov, D.V., Osolodkin, D.I.,**  
943 **Schmülling, T., and Romanov, G.A.** (2015). Plant membrane assays with  
944 cytokinin receptors underpin the unique role of free cytokinin bases as biologically  
945 active ligands. *J. Exp. Bot.* **66**: 1851–1863.
- 946 **Lomin, S.N., Yonekura-Sakakibara, K., Romanov, G.A., and Sakakibara, H.** (2011).  
947 Ligand-binding properties and subcellular localization of maize cytokinin receptors.  
948 *J. Exp. Bot.* **62**: 5149–5159.
- 949 **Long, J.A., Moan, E.I., Medford, J.I., and Barton, M.K.** (1996). A member of the  
950 KNOTTED class of homeodomain proteins encoded by the STM gene of  
951 *Arabidopsis*. *Nature* **379**: 66–69.
- 952 **Mahonen, A.P., Higuchi, M., Tormakangas, K., Miyawaki, K., Pischke, M.S.,**  
953 **Sussman, M.R., Helariutta, Y., and Kakimoto, T.** (2006). Cytokinins Regulate a  
954 Bidirectional Phosphorelay Network in *Arabidopsis*. *Curr. Biol.* **16**: 1116–1122.
- 955 **Manoli, A., Sturaro, A., Trevisan, S., Quaggiotti, S., and Nonis, A.** (2012). Evaluation  
956 of candidate reference genes for qPCR in maize. *J. Plant Physiol.* **169**: 807–815.
- 957 **McConnell, J.R. and Barton, M.K.** (1998). Leaf polarity and meristem formation in  
958 *Arabidopsis*. *Development* **125**: 2935–2942.
- 959 **Miwa, K., Ishikawa, K., Terada, K., Yamada, H., Suzuki, T., Yamashino, T., and**  
960 **Mizuno, T.** (2007). Identification of Amino Acid Substitutions that Render the  
961 *Arabidopsis* Cytokinin Receptor Histidine Kinase AHK4 Constitutively Active. *Plant*  
962 *Cell Physiol* **48**: 1809–1814.
- 963 **Mok, D.W. and Mok, M.C.** (2001). CYTOKININ METABOLISM AND ACTION. *Annu.*  
964 *Rev. Plant Physiol. Plant Mol. Biol.* **52**: 89–118.
- 965 **Moon, J., Candela, H., and Hake, S.** (2013). The Liguleless narrow mutation affects  
966 proximal-distal signaling and leaf growth. *Development* **140**: 405–412.
- 967 **Moose, S.P., Lauter, N., and Carlson, S.R.** (2004). The Maize macrohairless1 Locus  
968 Specifically Promotes Leaf Blade Macrohair Initiation and Responds to Factors  
969 Regulating Leaf Identity. *Genetics* **166**: 1451–1461.

- 970 **Muehlbauer, G.J., Fowler, J.E., and Freeling, M.** (1997). Sectors expressing the  
971 homeobox gene *liguleless3* implicate a time-dependent mechanism for cell fate  
972 acquisition along the proximal-distal axis of the maize leaf. *Development* **124**:  
973 5097–5106.
- 974 **Muller, B. and Sheen, J.** (2008). Cytokinin and auxin interaction in root stem-cell  
975 specification during early embryogenesis. *Nature* **453**: 1094–1097.
- 976 **Nardmann, J., Ji, J., Werr, W., and Scanlon, M.J.** (2004). The maize duplicate genes  
977 *narrow sheath1* and *narrow sheath2* encode a conserved homeobox gene function  
978 in a lateral domain of shoot apical meristems. *Development* **131**: 2827–2839.
- 979 **Nelissen, H., Rymer, B., Jikumaru, Y., Demuyne, K., Van Lijsebettens, M.,  
980 Kamiya, Y., Inzé, D., and Beemster, G.T.S.** (2012). A Local Maximum in  
981 Gibberellin Levels Regulates Maize Leaf Growth by Spatial Control of Cell Division.  
982 *Curr. Biol.* **22**: 1183–1187.
- 983 **Nishimura, C., Ohashi, Y., Sato, S., Kato, T., Tabata, S., and Ueguchi, C.** (2004).  
984 Histidine Kinase Homologs That Act as Cytokinin Receptors Possess Overlapping  
985 Functions in the Regulation of Shoot and Root Growth in Arabidopsis. *Plant Cell*  
986 **16**: 1365–1377.
- 987 **Norberg, M., Holmlund, M., and Nilsson, O.** (2005). The *BLADE ON PETIOLE* genes  
988 act redundantly to control the growth and development of lateral organs.  
989 *Development* **132**: 2203–2213.
- 990 **Ohno, C.K., Reddy, G.V., Heisler, M.G.B., and Meyerowitz, E.M.** (2004). The  
991 Arabidopsis *JAGGED* gene encodes a zinc finger protein that promotes leaf tissue  
992 development. *Development* **131**: 1111–1122.
- 993 **Ori, N., Eshed, Y., Chuck, G., Bowman, J.L., and Hake, S.** (2000). Mechanisms that  
994 control *knox* gene expression in the Arabidopsis shoot. *Development* **127**: 5523–  
995 5532.
- 996 **Pattanaik, S., Patra, B., Singh, S., and Yuan, L.** (2014). An overview of the gene  
997 regulatory network controlling trichome development in the model plant,  
998 Arabidopsis. *Front. Plant Sci.* **5**: 259.

- 999 **Pozzi, C., Rossini, L., and Agosti, F.** (2001). Patterns and symmetries in leaf  
1000 development. *Semin Cell Dev Biol* **12**: 363–372.
- 1001 **Ramirez, J., Bolduc, N., Lisch, D., and Hake, S.** (2009). Distal Expression of knotted1  
1002 in Maize Leaves Leads to Reestablishment of Proximal/Distal Patterning and Leaf  
1003 Dissection. *Plant Physiol.* **151**: 1878–1888.
- 1004 **Rashotte, A.M., Mason, M.G., Hutchison, C.E., Ferreira, F.J., Schaller, G.E., and**  
1005 **Kieber, J.J.** (2006). A subset of Arabidopsis AP2 transcription factors mediates  
1006 cytokinin responses in concert with a two-component pathway. *PNAS* **103**: 11081–  
1007 11085.
- 1008 **Reiser, L., Sanchez-Baracaldo, P., and Hake, S.** (2000). Knots in the family tree:  
1009 evolutionary relationships and functions of knox homeobox genes. *Plant Mol Biol*  
1010 **42**: 151–166.
- 1011 **Riefler, M., Novak, O., Strnad, M., and Schmulling, T.** (2006). Arabidopsis Cytokinin  
1012 Receptor Mutants Reveal Functions in Shoot Growth, Leaf Senescence, Seed  
1013 Size, Germination, Root Development, and Cytokinin Metabolism. *Plant Cell* **18**:  
1014 40–54.
- 1015 **Romanov, G.A.** (1990). Cytokinins and tRNAs: a hypothesis on their competitive  
1016 interaction via specific receptor proteins. *Plant. Cell Environ.* **13**: 751–754.
- 1017 **Romanov, G.A., Spíchal, L., Lomin, S.N., Strnad, M., and Schmölling, T.** (2005). A  
1018 live cell hormone-binding assay on transgenic bacteria expressing a eukaryotic  
1019 receptor protein. *Anal. Biochem.* **347**: 129–134.
- 1020 **Ronquist, F. and Huelsenbeck, J.P.** (2003). MrBayes 3: Bayesian phylogenetic  
1021 inference under mixed models. *Bioinformatics* **19**: 1572–1574.
- 1022 **Sakamoto, T., Kamiya, N., Ueguchi-Tanaka, M., Iwahori, S., and Matsuoka, M.**  
1023 (2001). KNOX homeodomain protein directly suppresses the expression of a  
1024 gibberellin biosynthetic gene in the tobacco shoot apical meristem. *Genes Dev* **15**:  
1025 581–590.
- 1026 **Sakamoto, T., Sakakibara, H., Kojima, M., Yamamoto, Y., Nagasaki, H., Inukai, Y.,**  
1027 **Sato, Y., and Matsuoka, M.** (2006). Ectopic Expression of KNOTTED1-Like

- 1028 Homeobox Protein Induces Expression of Cytokinin Biosynthesis Genes in Rice.  
1029 Plant Physiol. **142**: 54–62.
- 1030 **Scarpella, E., Marcos, D., Friml, J., and Berleth, T.** (2006). Control of leaf vascular  
1031 patterning by polar auxin transport. Genes Dev. **20**: 1015–1027.
- 1032 **Schneeberger, R.G., Becraft, P.W., Hake, S., and Freeling, M.** (1995). Ectopic  
1033 expression of the knox homeo box gene rough sheath1 alters cell fate in the maize  
1034 leaf. Genes Dev. **9**: 2292–2304.
- 1035 **Shani, E., Yanai, O., and Ori, N.** (2006). The role of hormones in shoot apical meristem  
1036 function. Curr. Opin. Plant Biol. **9**: 484–489.
- 1037 **Silverman, B.W.** (1986). Density estimation for statistics and data analysis (Chapman  
1038 and Hall).
- 1039 **Skoog, F. and Armstrong, D.** (1970). Cytokinins. Annu. Rev. Plant Physiol. **21**: 359–  
1040 384.
- 1041 **Smith, L.G., Greene, B., Veit, B., and Hake, S.L.B.-P.B.S.R. 3380** (1992). A dominant  
1042 mutation in the maize homeobox gene, Knotted-1, causes its ectopic expression in  
1043 leaf cells with altered fates. Development **116**: 21–30.
- 1044 **Sparkes, I.A., Runions, J., Kearns, A., and Hawes, C.** (2006). Rapid, transient  
1045 expression of fluorescent fusion proteins in tobacco plants and generation of stably  
1046 transformed plants. Nat. Protoc. **1**: 2019–2025.
- 1047 **Steklov, M., Lomin, S.N., Osolodkin, D.I., and Romanov, G.A.** (2013). Structural  
1048 basis for cytokinin receptor signaling: an evolutionary approach. Plant Cell Rep. **32**:  
1049 781–793.
- 1050 **Suzuki, T., Ishikawa, K., Yamashino, T., and Mizuno, T.** (2002). An Arabidopsis  
1051 Histidine-Containing Phosphotransfer (HPt) Factor Implicated in Phosphorelay  
1052 Signal Transduction: Overexpression of AHP2 in Plants Results in  
1053 Hypersensitiveness to Cytokinin. Plant Cell Physiol **43**: 123–129.
- 1054 **Suzuki, T., Miwa, K., Ishikawa, K., Yamada, H., Aiba, H., and Mizuno, T.** (2001). The  
1055 Arabidopsis Sensor His-kinase, AHK4, Can Respond to Cytokinins. Plant Cell  
1056 Physiol. **42**: 107–113.

- 1057 **Sylvester, A.W., Cande, W.Z., and Freeling, M.** (1990). Division and differentiation  
1058 during normal and liguleless-1 maize leaf development. *Development* **110**: 985–  
1059 1000.
- 1060 **Sylvester, A.W., Smith, L., and Freeling, M.** (1996). Acquisition of identity in the  
1061 developing leaf. *Annu. Rev. Cell Dev. Biol.* **12**: 257–304.
- 1062 **Tavakol, E. et al.** (2015). The Barley Uniculme4 Gene Encodes a BLADE-ON-  
1063 PETIOLE-Like Protein That Controls Tillering and Leaf Patterning. *Plant Physiol.*  
1064 **168**: 164 LP – 174.
- 1065 **Tirichine, L., Sandal, N., Madsen, L.H., Radutoiu, S., Albrechtsen, A.S., Sato, S.,**  
1066 **Asamizu, E., Tabata, S., and Stougaard, J.** (2007). A Gain-of-Function Mutation  
1067 in a Cytokinin Receptor Triggers Spontaneous Root Nodule Organogenesis.  
1068 *Science* (80-. ). **315**: 104–107.
- 1069 **To, J.P.C., Haberer, G., Ferreira, F.J., Deruere, J., Mason, M.G., Schaller, G.E.,**  
1070 **Alonso, J.M., Ecker, J.R., and Kieber, J.J.** (2004). Type-A Arabidopsis Response  
1071 Regulators Are Partially Redundant Negative Regulators of Cytokinin Signaling.  
1072 *Plant Cell* **16**: 658–671.
- 1073 **To, J.P.C. and Kieber, J.J.** (2008). Cytokinin signaling: two-components and more.  
1074 *Trends Plant Sci.* **13**: 85–92.
- 1075 **Toriba, T., Tokunaga, H., Shiga, T., Nie, F., Naramoto, S., Honda, E., Tanaka, K.,**  
1076 **Taji, T., Itoh, J.-I., and Kyojuka, J.** (2019). BLADE-ON-PETIOLE genes  
1077 temporally and developmentally regulate the sheath to blade ratio of rice leaves.  
1078 *Nat. Commun.* **10**: 619.
- 1079 **Tsiantis, M., Schneeberger, R., Golz, J.F., Freeling, M., and Langdale, J.A.** (1999).  
1080 The maize rough sheath2 gene and leaf development programs in monocot and  
1081 dicot plants. *Science* (80-. ). **284**: 154–156.
- 1082 **Tsuda, K., Kurata, N., Ohyanagi, H., and Hake, S.** (2014). Genome-Wide Study of  
1083 KNOX Regulatory Network Reveals Brassinosteroid Catabolic Genes Important for  
1084 Shoot Meristem Function in Rice. *Plant Cell* **26**: 3488–3500.
- 1085 **Tsukaya, H.** (1998). Genetic evidence for polarities that regulate leaf morphogenesis. *J.*

- 1086 Plant Res. **111**: 113–119.
- 1087 **Voinnet, O., Rivas, S., Mestre, P., and Baulcombe, D.** (2003). An enhanced transient  
1088 expression system in plants based on suppression of gene silencing by the p19  
1089 protein of tomato bushy stunt virus. *Plant J.* **33**: 949–956.
- 1090 **Wand, M.P. and Jones, M.C.** (1995). *Kernel Smoothing* Vol. 60 of *Monographs on*  
1091 *statistics and applied probability.* (Chapman and Hall, London).
- 1092 **Werner, T., Motyka, V., Laucou, V., Smets, R., Van Onckelen, H., and Schmülling,**  
1093 **T.** (2003). Cytokinin-Deficient Transgenic Arabidopsis Plants Show Multiple  
1094 Developmental Alterations Indicating Opposite Functions of Cytokinins in the  
1095 Regulation of Shoot and Root Meristem Activity. *Plant Cell* **15**: 2532–2550.
- 1096 **Werner, T., Motyka, V., Strnad, M., and Schmülling, T.** (2001). Regulation of plant  
1097 growth by cytokinin. *PNAS* **98**: 10487–10492.
- 1098 **Wickham, H.** (2009). *ggplot2* (Springer New York: New York).
- 1099 **Yamada, H., Suzuki, T., Terada, K., Takei, K., Ishikawa, K., Miwa, K., Yamashino,**  
1100 **T., and Mizuno, T.** (2001). The Arabidopsis AHK4 Histidine Kinase is a Cytokinin-  
1101 Binding Receptor that Transduces Cytokinin Signals Across the Membrane. *Plant*  
1102 *Cell Physiol* **42**: 1017–1023.
- 1103 **Yanai, O., Shani, E., Dolezal, K., Tarkowski, P., Sablowski, R., Sandberg, G.,**  
1104 **Samach, A., and Ori, N.** (2005). Arabidopsis KNOXI Proteins Activate Cytokinin  
1105 Biosynthesis. *Curr. Biol.* **15**: 1566–1571.
- 1106 **Yonekura-Sakakibara, K., Kojima, M., Yamaya, T., and Sakakibara, H.** (2004).  
1107 Molecular Characterization of Cytokinin-Responsive Histidine Kinases in Maize.  
1108 Differential Ligand Preferences and Response to cis-Zeatin. *Plant Physiol.* **134**:  
1109 1654–1661.
- 1110 **Zhao, Y.** (2008). The role of local biosynthesis of auxin and cytokinin in plant  
1111 development. *Curr. Opin. Plant Biol.* **11**: 16–22.
- 1112 **Zhou, Z., Sun, L., Zhao, Y., An, L., Yan, A., Meng, X., and Gan, Y.** (2013). Zinc Finger  
1113 Protein 6 (ZFP6) regulates trichome initiation by integrating gibberellin and  
1114 cytokinin signaling in Arabidopsis thaliana. *New Phytol.* **198**: 699–708.



1115

1116

1117 **FIGURE LEGENDS**

1118

1119 **Figure 1.** *Hsf1* mutants alter leaf patterning and are caused by missense mutations  
1120 in the *ZmHK1* cytokinin receptor. **(A)** Adaxial view of half-leaves from WT and *Hsf1*-  
1121 *1603/+* sibs showing the proximal-distal organization of the sheath (s), ligule (l), auricle  
1122 (a) and blade (b) and a prong outgrowth (red triangle). Bar = 5 cm. **(B)** Close-up of a  
1123 blade margin (b) from WT and *Hsf1*-*1603/+* showing a prong consisting of proximal leaf  
1124 segments – sheath (s), ligule (l) and auricle (a) juxtaposed to the blade (b). Bar = 1 cm.  
1125 **(C)** Comparison of leaf phenotypes between the three *Hsf1* alleles. L4 (top), 4<sup>th</sup> leaf  
1126 below tassel; L5 (bottom, 5<sup>th</sup> leaf below tassel. Bar = 10 cm. **(D)** Amino acid alignment  
1127 of a portion of the CHASE domain from different plant his-kinase cytokinin receptors  
1128 and the three *Hsf1* mutant alleles. Missense residues are marked by black triangles for  
1129 the *Hsf1* alleles and by a white triangle for the *Lotus snf2* allele. Amino acid sequences  
1130 derived from AT2G01830 (*AHK4*), AM287033 (*LHK1* and *LHK1-snf2*), XM\_003570636  
1131 (*BdHK1*), XM\_002454271 (*SbHK1*), NM\_001111389 (*ZmHK1-NCBI*),  
1132 GRMZM2G151223 (*ZmHK1-MaizeGDB*), *ZmHK1* from the A619 inbred (*ZmHK1*-  
1133 *AEWL*) and the Mo17 inbred (*ZmHK1*-*1603* and *ZmHK1*-*1595*). **(E)** *ZmHK1* receptors  
1134 with *Hsf1* mutations show CK independent growth in a yeast his-kinase signaling assay.  
1135 Growth of *S. cerevisiae sln*  $\Delta$  mutant transformed with an empty vector, the *ZmHK1*  
1136 vector or one of the *Hsf1* mutant *ZmHK1* vectors on glucose media with no CK (DMSO)  
1137 or supplemented with different cytokinins - iP, tZ, or cZ. Growth on galactose media of  
1138 the *sln*  $\Delta$  mutant transformed with each of the assayed vectors. DMSO, dimethyl  
1139 sulfoxide; iP, *N*<sup>6</sup>-( $\Delta^2$ -isopentenyl)adenine; tZ, *trans*-zeatin; cZ, *cis*-zeatin. Dilutions of  
1140 yeast cultures (O.D.<sub>600</sub> = 1.0) for each yeast strain are noted on the left of each image.  
1141 **(F)** Ribbon diagram of the *ZmHK1* CHASE domain with the *Hsf1* mutations (magenta)  
1142 noted and one molecule of *N*<sup>6</sup>-( $\Delta^2$ -isopentenyl)adenine (blue and aqua) complexed in  
1143 the binding pocket. Arginine 192 (blue), in the loop domain (red) forming one face of

1144 the binding cavity, is predicted to form a salt bridge with E236, the residue altered in  
1145 *Hsf1-1603*. *Hsf1-1595* is P190L, *Hsf1-1603* is E236K and *Hsf1-AEWL* is L238F.

1146

1147 **Figure 2.** Exogenous CK treatment phenocopies the *Hsf1* leaf development defects  
1148 and enhances the *Hsf1* mutation. (A) Phenotype of 3-week old wild type and  
1149 heterozygous *Hsf1-1603/+* seedlings. Bar = 2 cm. (B) Phenotypes of 3-week old B73  
1150 water (- CK) and 10  $\mu$ M 6-BAP treated (+ CK) seedlings. Bar = 2 cm. (C) Boxplots of  
1151 leaf sizes comparing wild type (WT) to *Hsf1-1603/+* sib seedlings, and B73 water (- CK)  
1152 and 10  $\mu$ M 6-BAP treated (+ CK) seedlings. Horizontal bars represent the maximum,  
1153 third quantile, median, first quantile, and minimum values respectively, dots outside of  
1154 the plot are outliers, and the \* indicates a *P*-value  $\leq 0.0001$  calculated from a two-tailed  
1155 Student's t-test. (D) Macrohair production on the abaxial sheath and auricle (white  
1156 triangles) of 2-week old B73 water (- CK) and 10  $\mu$ M 6-BAP treated (+ CK) seedlings.  
1157 Insets show an adaxial view of the sheath-blade boundary of leaf 1. (E) Glue  
1158 impressions of adaxial leaf 1 blade from 2-week old B73 water (- CK) and 10  $\mu$ M 6-BAP  
1159 treated (+ CK) seedlings showing increased macrohair presence in the medial blade  
1160 and at the margin. (F) CK-induced prong formation in B73 seedlings ( $n \geq 12$  for each  
1161 treatment). (G) Effect of CK treatment on prong formation in 2-week old *Hsf1-1603/+*  
1162 seedlings (yellow arrows mark prongs). Bar = 2 cm. (H) Frequency and leaf number  
1163 where the first prong formed in *Hsf1-1603/+* with (red) and without (blue) 10  $\mu$ M 6-BAP  
1164 treatment ( $n \geq 12$  for each treatment). (I) Close-up of prongs formed on leaf 4 from CK-  
1165 treated and control *Hsf1-1603/+* seedlings (in [G]). (J) Macrohair production on 2-week  
1166 old seedlings due to CK treatment or *Hsf1-1603/+* mutation or both.

1167

1168 **Figure 3.** Expression of CK signaling and responsive genes. (A) Relative mRNA  
1169 accumulation of CK genes in different tissues of 2-week old seedlings of the three *Hsf1*  
1170 alleles and WT sibs measured by qPCR. For each genotype, values are the means  
1171 ( $\pm$ SE) of three biological replicates consisting of tissue pooled from at least 3 plants. .

1172 Asterisks indicate significant differences between WT and *Hsf1/+* sib (Student's *t* test, *P*  
1173  $\leq 0.05$ ). GL – Green leaf, IL – immature leaf, SA –shot apex. **(B)** Pattern of *ZmHK1* and  
1174 *ZmRR3* transcript accumulation in WT and *Hsf1-1603/+* shoot apex. Longitudinal and  
1175 transverse sections were hybridized with *ZmHK1* or *ZmRR3* specific antisense probes.  
1176 The longitudinal section of *ZmRR3* hybridized to WT is not medial and so *ZmRR3*  
1177 expression appears to be apically localized, but it is not. Initiating leaf primordia (yellow  
1178 arrows) and leaf primordia margins (red triangles) are marked in the *Hsf1/+* sections  
1179 probed with *ZmRR3*. Bar = 30  $\mu\text{m}$ .

1180

1181 **Figure 4.** The *Hsf1* phenotype is enhanced by loss of *ZmRR3* function. **(A)**  
1182 Phenotypes of 30-day old (left to right) WT, *abph1/abph1*, *Hsf1-1603/+*, and *Hsf1-*  
1183 *1603/+*, *abph1/abph1* mutants. This family segregated 9 wild type, 12 *abph1/abph1*, 10  
1184 *Hsf1-1603/+*, and 15 double *Hsf1-1603/+*, *abph1/abph1*, which fits a 1:1:1:1 expected  
1185 ratio. Inset shows a close-up of a double *Hsf1*, *abph1* mutant. Bar = 15 cm. **(B)**  
1186 Phenotypes of 60-day old plants segregating the same four genotypes in **(A)**. Bar = 10  
1187 cm. Insets in the double mutant images show close-ups of prongs from that genotype.  
1188 Yellow and red arrowheads mark paired leaves on the *abph1* mutant and prongs on the  
1189 *Hsf1/+* mutant, respectively.

1190

1191

1192

1193 **Supplemental Data**

1194

1195 **Supplemental Figure 1.** *Hsf1* phenotypes.

1196 **Supplemental Figure 2.** Prong formation is patterned in *Hsf1* leaves.

1197 **Supplemental Figure 3.** ZmHK1 activity in heterologous yeast his-kinase assay.

1198 **Supplemental Figure 4.** Comparison of ligand binding affinity constants of wild type  
1199 and mutant ZmHK1 receptors.

1200 **Supplemental Figure 5.** Effects of CK treatment on leaf growth.

1201 **Supplemental Table 1.** Mature plant phenotypes of the three *Hsf1* alleles.

1202 **Supplemental Table 2.** Frequency of prongs for the three *Hsf1* alleles by leaf position in the  
1203 upper shoot..

1204 **Supplemental Table 3:** Primers used for positional cloning or genotyping

1205 **Supplemental Table 4.** Primers used for expression analysis

1206

1207 **Tables**

1208

1209 **Table 1. Apparent affinity constants  $K_D^*$  for wild type and mutant ZmHK1**  
1210 **receptors with different cytokinins**

| <b><math>K_D^*</math> for cytokinins (nM)</b> |                 |           |           |           |           |            |           |           |            |
|-----------------------------------------------|-----------------|-----------|-----------|-----------|-----------|------------|-----------|-----------|------------|
| <b>Assay</b>                                  | <b>Receptor</b> | <b>iP</b> | <b>BA</b> | <b>tZ</b> | <b>cZ</b> | <b>Kin</b> | <b>TD</b> | <b>DZ</b> | <b>Ade</b> |
| Bacterial spheroplasts                        | ZmHK1           | 2.90      | 3.69      | 31.8      | 37.5      | 33.0       | 37.6      | 312.0     | >10000     |
|                                               | <i>AEWL</i>     | 0.36      | 0.56      | 6.38      | 5.56      | 7.62       | 93.7      | 61.6      | >10000     |
|                                               | <i>1603</i>     | 0.59      | 0.91      | 7.27      | 6.74      | 7.50       | 111.0     | 88.0      | >10000     |
| Tobacco membrane                              | ZmHK1           | 0.52      | 1.42      | 7.16      | 8.31      | -          | 49.2      | 114.0     | >10000     |
|                                               | <i>1595</i>     | 0.23      | 0.31      | 1.65      | 2.14      | -          | 71.9      | 14.1      | >10000     |

1211 iP,  $N^6$ -( $\Delta^2$ -isopentenyl)adenine; BA, 6-benzylaminopurine; tZ, *trans*-zeatin; cZ, *cis*-  
1212 zeatin; Kin, kinetin; TD, thidiazuron; DHZ, dihydrozeatin, Ade, adenine.

1213

1214

1215

1216

1217

1218

1219

1220

1221 **Table 2. Fold increase of affinity to various cytokinins of mutant receptors**  
1222 **compared to ZmHK1**

| Cytokinin    | Receptor               |                |                     |
|--------------|------------------------|----------------|---------------------|
|              | ZmHK1-<br>AEWL         | ZmHK1-<br>1603 | ZmHK1-<br>1595      |
| iP           | 8.06                   | 4.92           | 2.26                |
| BA           | 6.59                   | 4.05           | 4.58                |
| tZ           | 4.98                   | 4.37           | 4.34                |
| cZ           | 6.74                   | 5.56           | 3.88                |
| Kin          | 4.33                   | 4.40           | -                   |
| TD           | 0.4                    | 0.39           | 0.68                |
| DZ           | 5.06                   | 3.55           | 8.09                |
| <b>Assay</b> | Bacterial spheroplasts |                | Tobacco<br>membrane |

1223 iP,  $N^6$ -( $\Delta^2$ -isopentenyl)adenine; BA, 6-benzylaminopurine; tZ, *trans*-zeatin; cZ, *cis*-  
1224 zeatin; Kin, kinetin; TD, thidiazuron; DHZ, dihydrozeatin, Ade, adenine.

1225

1226

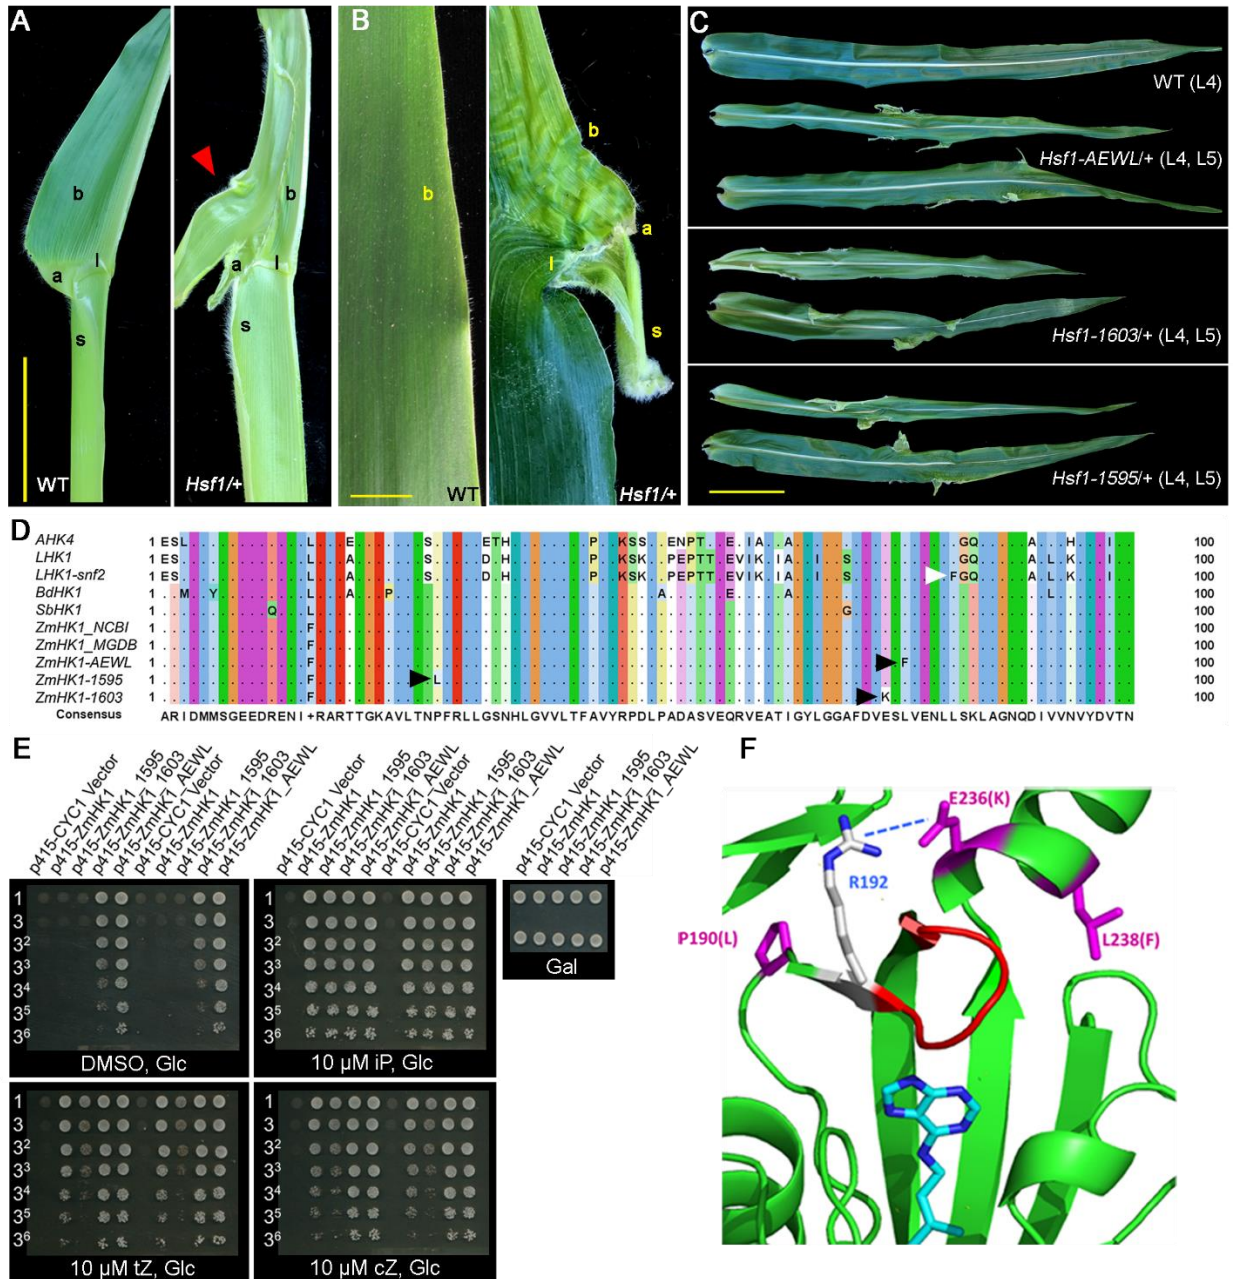

1227  
1228

1229 **Figure 1.** *Hsf1* mutants alter leaf patterning and are caused by missense mutations  
1230 in the *ZmHK1* cytokinin receptor. **(A)** Adaxial view of half-leaves from WT and *Hsf1*-  
1231 *1603/+* sibs showing the proximal-distal organization of the sheath (s), ligule (l), auricle  
1232 (a) and blade (b) and a prong outgrowth (red triangle). Bar = 5 cm. **(B)** Close-up of a  
1233 blade margin (b) from WT and *Hsf1-1603/+* showing a prong consisting of proximal leaf  
1234 segments – sheath (s), ligule (l) and auricle (a) juxtaposed to the blade (b). Bar = 1 cm.  
1235 **(C)** Comparison of leaf phenotypes between the three *Hsf1* alleles. L4 (top), 4<sup>th</sup> leaf  
1236 below tassel; L5 (bottom, 5<sup>th</sup> leaf below tassel). Bar = 10 cm. **(D)** Amino acid alignment  
1237 of a portion of the CHASE domain from different plant his-kinase cytokinin receptors  
1238 and the three *Hsf1* mutant alleles. Missense residues are marked by black triangles for



1239 the *Hsf1* alleles and by a white triangle for the *Lotus snf2* allele. Amino acid sequences  
1240 derived from AT2G01830 (*AHK4*), AM287033 (*LHK1* and *LHK1-snf2*), XM\_003570636  
1241 (*BdHK1*), XM\_002454271 (*SbHK1*), NM\_001111389 (*ZmHK1-NCBI*),  
1242 GRMZM2G151223 (*ZmHK1-MaizeGDB*), *ZmHK1* from the A619 inbred (*ZmHK1-*  
1243 *AEWL*) and the Mo17 inbred (*ZmHK1-1603* and *ZmHK1-1595*). **(E)** *ZmHK1* receptors  
1244 with *Hsf1* mutations show CK independent growth in a yeast his-kinase signaling assay.  
1245 Growth of *S. cerevisiae sln*  $\Delta$  mutant transformed with an empty vector, the *ZmHK1*  
1246 vector or one of the *Hsf1* mutant *ZmHK1* vectors on glucose media with no CK (DMSO)  
1247 or supplemented with different cytokinins - iP, tZ, or cZ. Growth on galactose media of  
1248 the *sln*  $\Delta$  mutant transformed with each of the assayed vectors. DMSO, dimethyl  
1249 sulfoxide; iP, *N*<sup>6</sup>-( $\Delta^2$ -isopentenyl)adenine; tZ, *trans*-zeatin; cZ, *cis*-zeatin. Dilutions of  
1250 yeast cultures (O.D.<sub>600</sub> = 1.0) for each yeast strain are noted on the left of each image.  
1251 **(F)** Ribbon diagram of the *ZmHK1* CHASE domain with the *Hsf1* mutations (magenta)  
1252 noted and one molecule of *N*<sup>6</sup>-( $\Delta^2$ -isopentenyl)adenine (blue and aqua) complexed in  
1253 the binding pocket. Arginine 192 (blue), in the loop domain (red) forming one face of  
1254 the binding cavity, is predicted to form a salt bridge with E236, the residue altered in  
1255 *Hsf1-1603*. *Hsf1-1595* is P190L, *Hsf1-1603* is E236K and *Hsf1-AEWL* is L238F.  
1256  
1257  
1258  
1259  
1260  
1261  
1262

1263

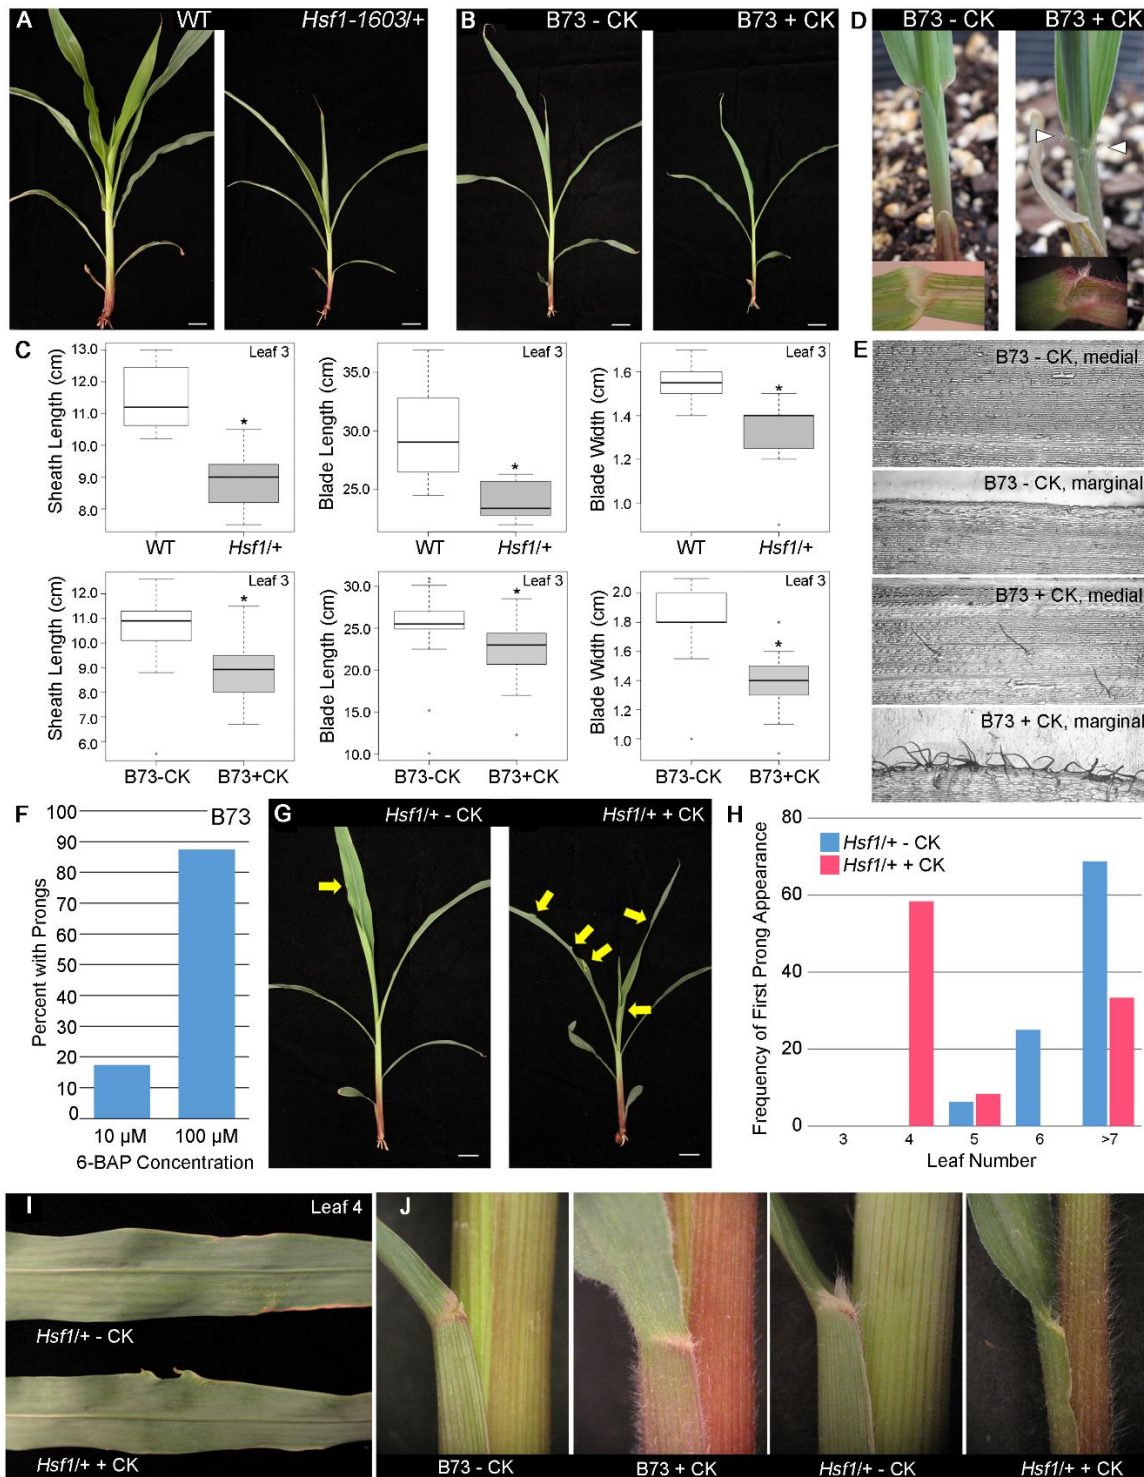

1264

1265

1266

1267

1268

1269

**Figure 2.** Exogenous CK treatment phenocopies the *Hsf1* leaf development defects and enhances the *Hsf1* mutation. **(A)** Phenotype of 3-week old wild type and heterozygous *Hsf1-1603/+* seedlings. Bar = 2 cm. **(B)** Phenotypes of 3-week old B73 water (- CK) and 10  $\mu$ M 6-BAP treated (+ CK) seedlings. Bar = 2 cm. **(C)** Boxplots of

1270 leaf sizes comparing wild type (WT) to *Hsf1-1603/+* sib seedlings, and B73 water (- CK)  
1271 and 10  $\mu$ M 6-BAP treated (+ CK) seedlings. Horizontal bars represent the maximum,  
1272 third quantile, median, first quantile, and minimum values respectively, dots outside of  
1273 the plot are outliers, and the \* indicates a *P*-value  $\leq 0.0001$  calculated from a two-tailed  
1274 Student's t-test. (D) Macrohair production on the abaxial sheath and auricle (white  
1275 triangles) of 2-week old B73 water (- CK) and 10  $\mu$ M 6-BAP treated (+ CK) seedlings.  
1276 Insets show an adaxial view of the sheath-blade boundary of leaf 1. (E) Glue  
1277 impressions of adaxial leaf 1 blade from 2-week old B73 water (- CK) and 10  $\mu$ M 6-BAP  
1278 treated (+ CK) seedlings showing increased macrohair presence in the medial blade  
1279 and at the margin. (F) CK-induced prong formation in B73 seedlings ( $n \geq 12$  for each  
1280 treatment). (G) Effect of CK treatment on prong formation in 2-week old *Hsf1-1603/+*  
1281 seedlings (yellow arrows mark prongs). Bar = 2 cm. (H) Frequency and leaf number  
1282 where the first prong formed in *Hsf1-1603/+* with (red) and without (blue) 10  $\mu$ M 6-BAP  
1283 treatment ( $n \geq 12$  for each treatment). (I) Close-up of prongs formed on leaf 4 from CK-  
1284 treated and control *Hsf1-1603/+* seedlings (in [G]). (J) Macrohair production on 2-week  
1285 old seedlings due to CK treatment or *Hsf1-1603/+* mutation or both.

1286  
1287  
1288  
1289  
1290  
1291  
1292  
1293

1294

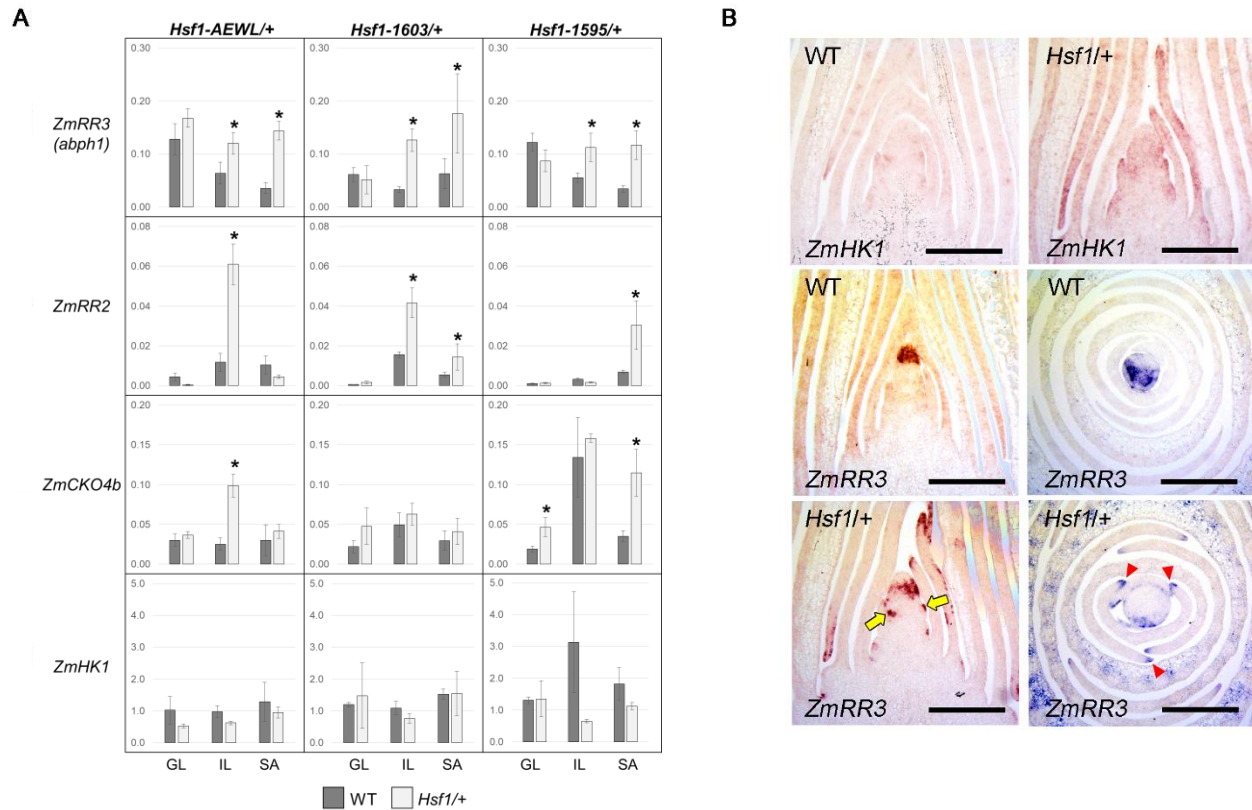

1295

1296

**Figure 3.** Expression of CK signaling and responsive genes. **(A)** Relative mRNA accumulation of CK genes in different tissues of 2-week old seedlings of the three *Hsf1* alleles and WT sibs measured by qPCR. For each genotype, values are the means ( $\pm$ SE) of three biological replicates consisting of tissue pooled from at least 3 plants. Asterisks indicate significant differences between WT and *Hsf1*+ sib (Student's *t* test,  $P \leq 0.05$ ). GL – Green leaf, IL – immature leaf, SA –shoot apex. **(B)** Pattern of *ZmHK1* and *ZmRR3* transcript accumulation in WT and *Hsf1-1603/+* shoot apex. Longitudinal and transverse sections were hybridized with *ZmHK1* or *ZmRR3* specific antisense probes. The longitudinal section of *ZmRR3* hybridized to WT is not medial and so *ZmRR3* expression appears to be apically localized, but it is not. Initiating leaf primordia (yellow arrows) and leaf primordia margins (red triangles) are marked in the *Hsf1*+ sections probed with *ZmRR3*. Bar = 30  $\mu$ m.

1309

1310

1311

1312

1313

1314

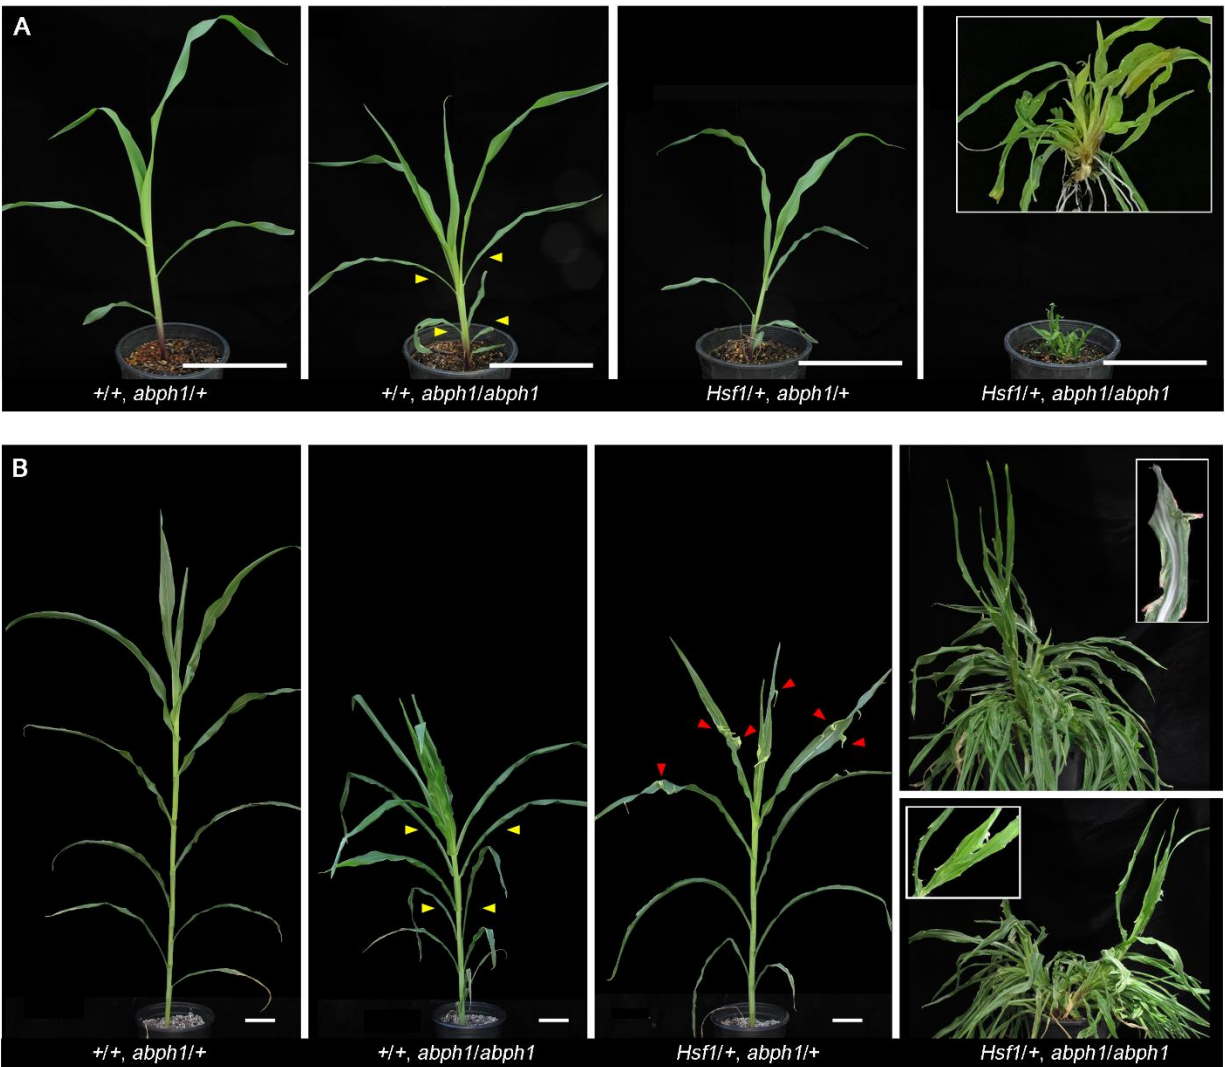

1315

1316

1317

1318

1319

1320

1321

1322

1323

1324

1325

1326

1327

1328

**Figure 4.** The *Hsf1* phenotype is enhanced by loss of *ZmRR3* function. **(A)** Phenotypes of 30-day old (left to right) WT, *abph1/abph1*, *Hsf1-1603/+*, and *Hsf1-1603/+*, *abph1/abph1* mutants. This family segregated 9 wild type, 12 *abph1/abph1*, 10 *Hsf1-1603/+*, and 15 double *Hsf1-1603/+*, *abph1/abph1*, which fits a 1:1:1:1 expected ratio. Inset shows a close-up of a double *Hsf1*, *abph1* mutant. Bar = 15 cm. **(B)** Phenotypes of 60-day old plants segregating the same four genotypes in [A]. Bar = 10 cm. Insets in the double mutant images show close-ups of prongs from that genotype. Yellow and red arrowheads mark paired leaves on the *abph1* mutant and prongs on the *Hsf1/+* mutant, respectively.
